# Supplementary material for: Abinukitrine A, a unique 17,18-cyclolanostane triterpenoid from Abies nukiangensis
Source: Royal Society of Chemistry journal article supplement (doi:10.1039/c8ob03117g), 2019-01-01

## Supplementary Information

### **Abinukitrine A, a unique 17,18-cyclolanostane triterpenoid from *Abies nukiangensis***

Yong-Li Li<sup>\*a</sup>, Li-Jun Xue<sup>c</sup>, Jie Li<sup>a</sup>, Li-Ming Chen<sup>a</sup>, Jian-Jun Wu<sup>a</sup>, Zhuo-Ni Xu<sup>a</sup>,  
YingChen<sup>a</sup>, Yu-Ping Tian<sup>a</sup>, Xian-Wen Yang<sup>\*b</sup>

<sup>a</sup>*Physical and Chemical Analysis laboratory, Division of Material Science & Quality  
Test, Shanghai Institute of Measurement and Testing Technology, 1500 Zhangheng  
Road, Shanghai 201203, China*

<sup>b</sup>*Key Laboratory of Marine Biogenetic Resources, Third Institute of Oceanography,  
Ministry of Natural Resources, 184 Daxue Road, Xiamen 361005, China*

<sup>c</sup>*Department of Medical Oncology, Jinling Hospital, Nanjing University Clinical  
School of Medicine, 305 East Zhongshan Road, Nanjing, 210002, China*

<sup>\*</sup>Corresponding authors. Tel.: +86-592-2195319; e-mail: yangxianwen@tio.org.cn;  
Tel.:+86-021-38839880-35150; e-mail: jinchi333@126.com

# Content

## Experimental procedures

**Table 1.** X-ray crystal data for abinukitrine A (**1**).

**Figure S1.**  $^1\text{H}$  NMR spectrum of compound **1** in  $\text{CDCl}_3$ .

**Figure S2.**  $^{13}\text{C}$  NMR spectrum of compound **1** in  $\text{CDCl}_3$ .

**Figure S3.** DEPT NMR spectrum of compound **1** in  $\text{CDCl}_3$ .

**Figure S4.** HSQC spectrum of compound **1** in  $\text{CDCl}_3$ .

**Figure S5.** HSQC expansion spectrum of compound **1** in  $\text{CDCl}_3$ .

**Figure S6.** HMBC spectrum of compound **1** in  $\text{CDCl}_3$ .

**Figure S7.** HMBC expansion spectrum of compound **1** in  $\text{CDCl}_3$ .

**Figure S8.**  $^1\text{H}$ - $^1\text{H}$  COSY spectrum of compound **1** in  $\text{CDCl}_3$ .

**Figure S9**  $^1\text{H}$ - $^1\text{H}$  COSY expansion spectrum of compound **1** in  $\text{CDCl}_3$ .

**Figure S10.** NOESY NMR spectrum of compound **1** in  $\text{CDCl}_3$ .

**Figure S11.** NOESY NMR expansion spectrum of compound **1** in  $\text{CDCl}_3$ .

## Experimental procedures

**General Experimental Procedures.** Infrared spectra were recorded on a Bruker IFS-66/S FT-IR spectrometer. NMR spectra were recorded on a Varian UNITY INOVA 500 NMR spectrometer. Optical rotations were measured on a Hanon P850 polarimeter. HRESIMS spectra were obtained on a Q-ToF mass spectrometer. Semi-preparative HPLC was performed using a Waters 600 pump with a waters 2489 uv/visible detector and a YMC C18 5  $\mu\text{m}$  column (10 mm  $\times$ 250 mm). Column chromatography was performed on ODS, silica gel, and Sephadex LH-20. TLC analysis was using the precoated silica gel plates.

**Plant Material.** The aerial parts of *Abies nukiangensis* were collected in Lushui, Yunnan Province, China in September 2015. The plant was identified by Yuan-Chun Zhou. A voucher specimen (SMMC-AB 1501) was deposited in the herbarium of physical and chemical analysis laboratory, Shanghai Institute of Measurement and Testing Technology, Shanghai, China.

**Extraction and Isolation.** The twigs and leaves of *A. nukiangensis* (5.0 kg) was extracted with EtOH under reflux and filtered. The filtrate was evaporated under reduced pressure to provide an EtOH extract (320 g), which was suspended in distilled H<sub>2</sub>O and successively partitioned with CH<sub>2</sub>Cl<sub>2</sub>, EtOAc, and *n*-BuOH, yielding 110 g, 75 g, and 102 g of residues, respectively. The CH<sub>2</sub>Cl<sub>2</sub>-soluble fraction (110 g) was subjected to CC on silica gel and eluted with CHCl<sub>3</sub>-MeOH (50:1 to 20:1) to yield five fractions (C1-C5). Fraction C4 (8.0 g) was separated over a RP-C<sub>18</sub> silica gel column with 80% MeOH to yield four subfractions (C4A-C4D). Subfraction C4D (1.2 g) was

separated on a silica gel column (CHCl<sub>3</sub>-MeOH, 14:1), followed by CC on Sephadex LH-20 (CHCl<sub>3</sub>-MeOH, 1:1) to give **1** (20.8 mg).

**Crystal preparation.** Compound **1** (2.0 mg) was dissolved in 0.5 mL pyridine-MeOH (1:1) solution, slow evaporation over days afforded crystals.

**Anti-HCV assay on GT1b cells.** Compound **1** was serially diluted in DMSO (0.016, 0.08, 0.4, 2, 10, 20  $\mu$ M) and then added to 96-well plates, in duplicate. Subsequently, GT1b cells were seeded and cultured in a humidified incubator containing 5% CO<sub>2</sub> at 37°C for 3 days. The cell viability was determined with the CellTiter-Fluor kit in accordance with the protocol provided by the supplier. While the antiviral activity was determined by monitoring replicon reporter firefly luciferase using Bright-Glo.

Inhibition rate (%) = (ZPE-CPD)/(ZPE-HPE)  $\times$  100 %, where

CPD: Signals of tested compounds.

ZPE: Signals of DMSO control.

HPE: Signals of medium control.

50% effective concentrations (EC<sub>50</sub>) value will be calculated with the GraphPad Prism software.

**Table S1. X-ray crystal data for abinukitrine A (1)**

|                                   |                                                                                                  |
|-----------------------------------|--------------------------------------------------------------------------------------------------|
| Identification code               | mjl18542                                                                                         |
| Empirical formula                 | C <sub>35</sub> H <sub>49</sub> N O <sub>4</sub>                                                 |
| Formula weight                    | 547.75                                                                                           |
| Temperature                       | 169.96 K                                                                                         |
| Wavelength                        | 1.34139 Å                                                                                        |
| Crystal system                    | Monoclinic                                                                                       |
| Space group                       | C 1 2 1                                                                                          |
| Unit cell dimensions              | a = 36.5813(18) Å    α = 90°<br>b = 6.2452(3) Å    β = 91.068(4)°<br>c = 13.6063(7) Å    γ = 90° |
| Volume                            | 3107.9(3) Å <sup>3</sup>                                                                         |
| Z                                 | 4                                                                                                |
| Density (calculated)              | 1.171 mg/m <sup>3</sup>                                                                          |
| Absorption coefficient            | 0.378 mm <sup>-1</sup>                                                                           |
| F(000)                            | 1192                                                                                             |
| Crystal size                      | 0.12 x 0.08 x 0.03 mm <sup>3</sup>                                                               |
| Theta range for data collection   | 3.491 to 55.114°.                                                                                |
| Index ranges                      | -44 ≤ h ≤ 44, -7 ≤ k ≤ 7, -16 ≤ l ≤ 16                                                           |
| Reflections collected             | 43183                                                                                            |
| Independent reflections           | 5924 [R(int) = 0.0559]                                                                           |
| Completeness to theta = 53.594°   | 99.60%                                                                                           |
| Absorption correction             | Semi-empirical from equivalents                                                                  |
| Max. and min. transmission        | 0.7508 and 0.5776                                                                                |
| Refinement method                 | Full-matrix least-squares on F <sup>2</sup>                                                      |
| Data / restraints / parameters    | 5924 / 1 / 372                                                                                   |
| Goodness-of-fit on F <sup>2</sup> | 1.052                                                                                            |
| Final R indices [I > 2σ(I)]       | R <sub>1</sub> = 0.0355, wR <sub>2</sub> = 0.0892                                                |
| R indices (all data)              | R <sub>1</sub> = 0.0373, wR <sub>2</sub> = 0.0908                                                |
| Absolute structure parameter      | 0.07(10)                                                                                         |
| Extinction coefficient            | n/a                                                                                              |
| Largest diff. peak and hole       | 0.174 and -0.177 e.Å <sup>-3</sup>                                                               |

Figure S1. <sup>1</sup>H NMR spectrum of compound 1 in CDCl<sub>3</sub>.

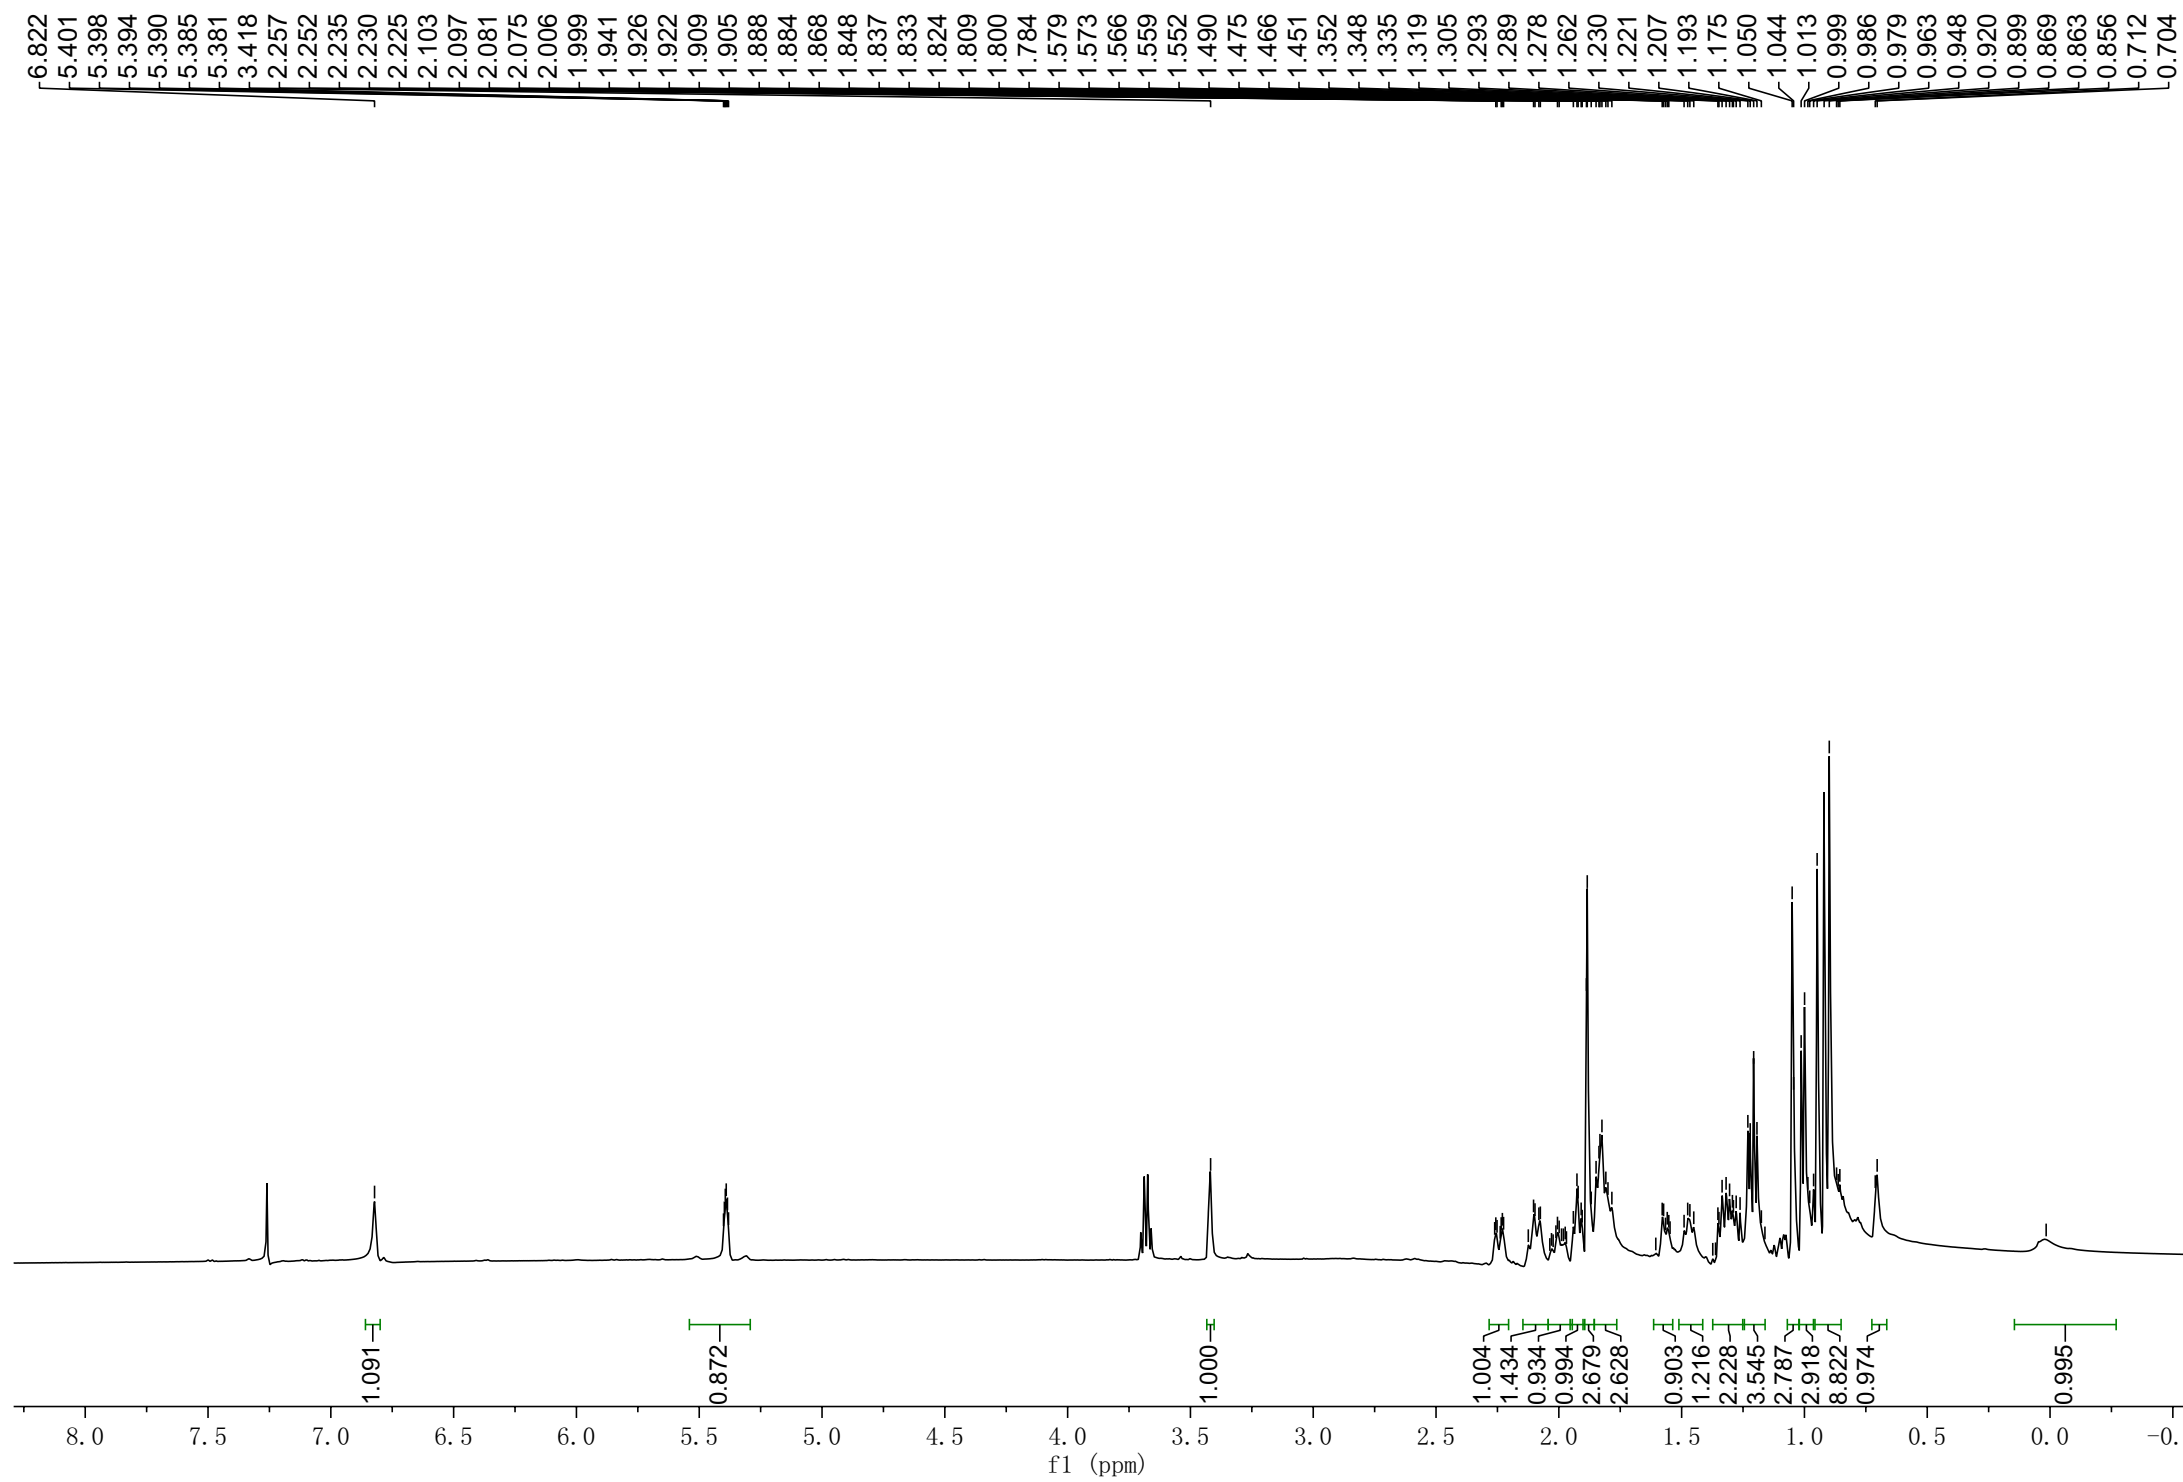

Figure S2.  $^{13}\text{C}$  NMR spectrum of compound 1 in  $\text{CDCl}_3$ .

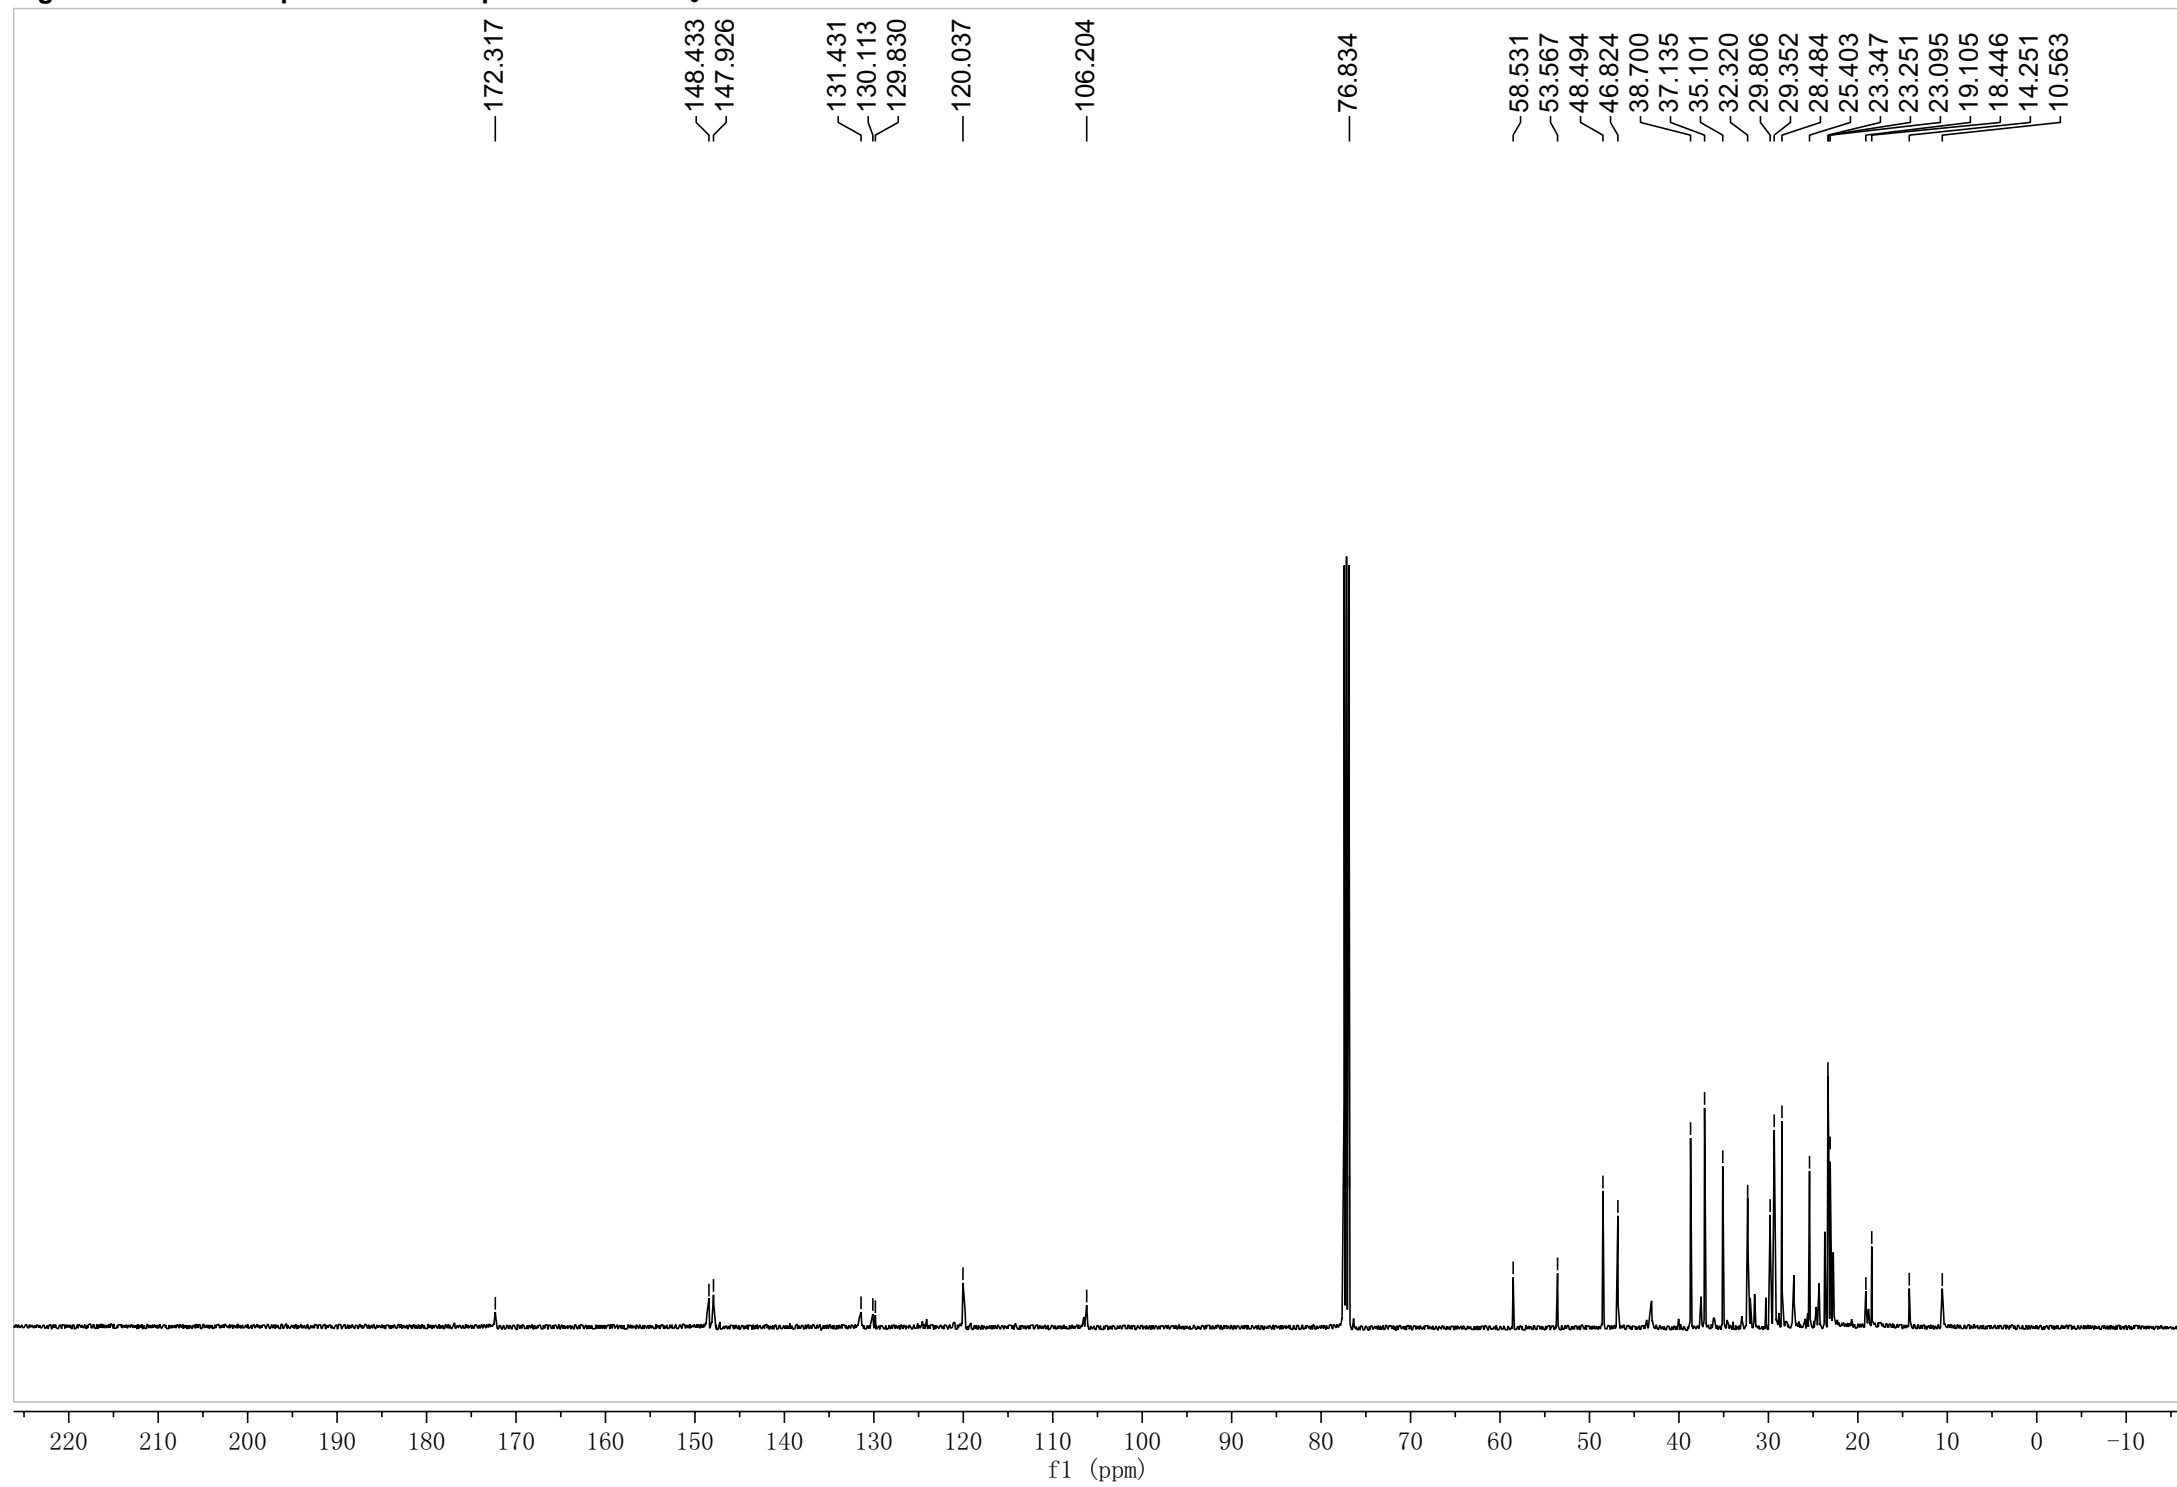

Figure S3. DEPT NMR spectrum of compound 1 in CDCl<sub>3</sub>.

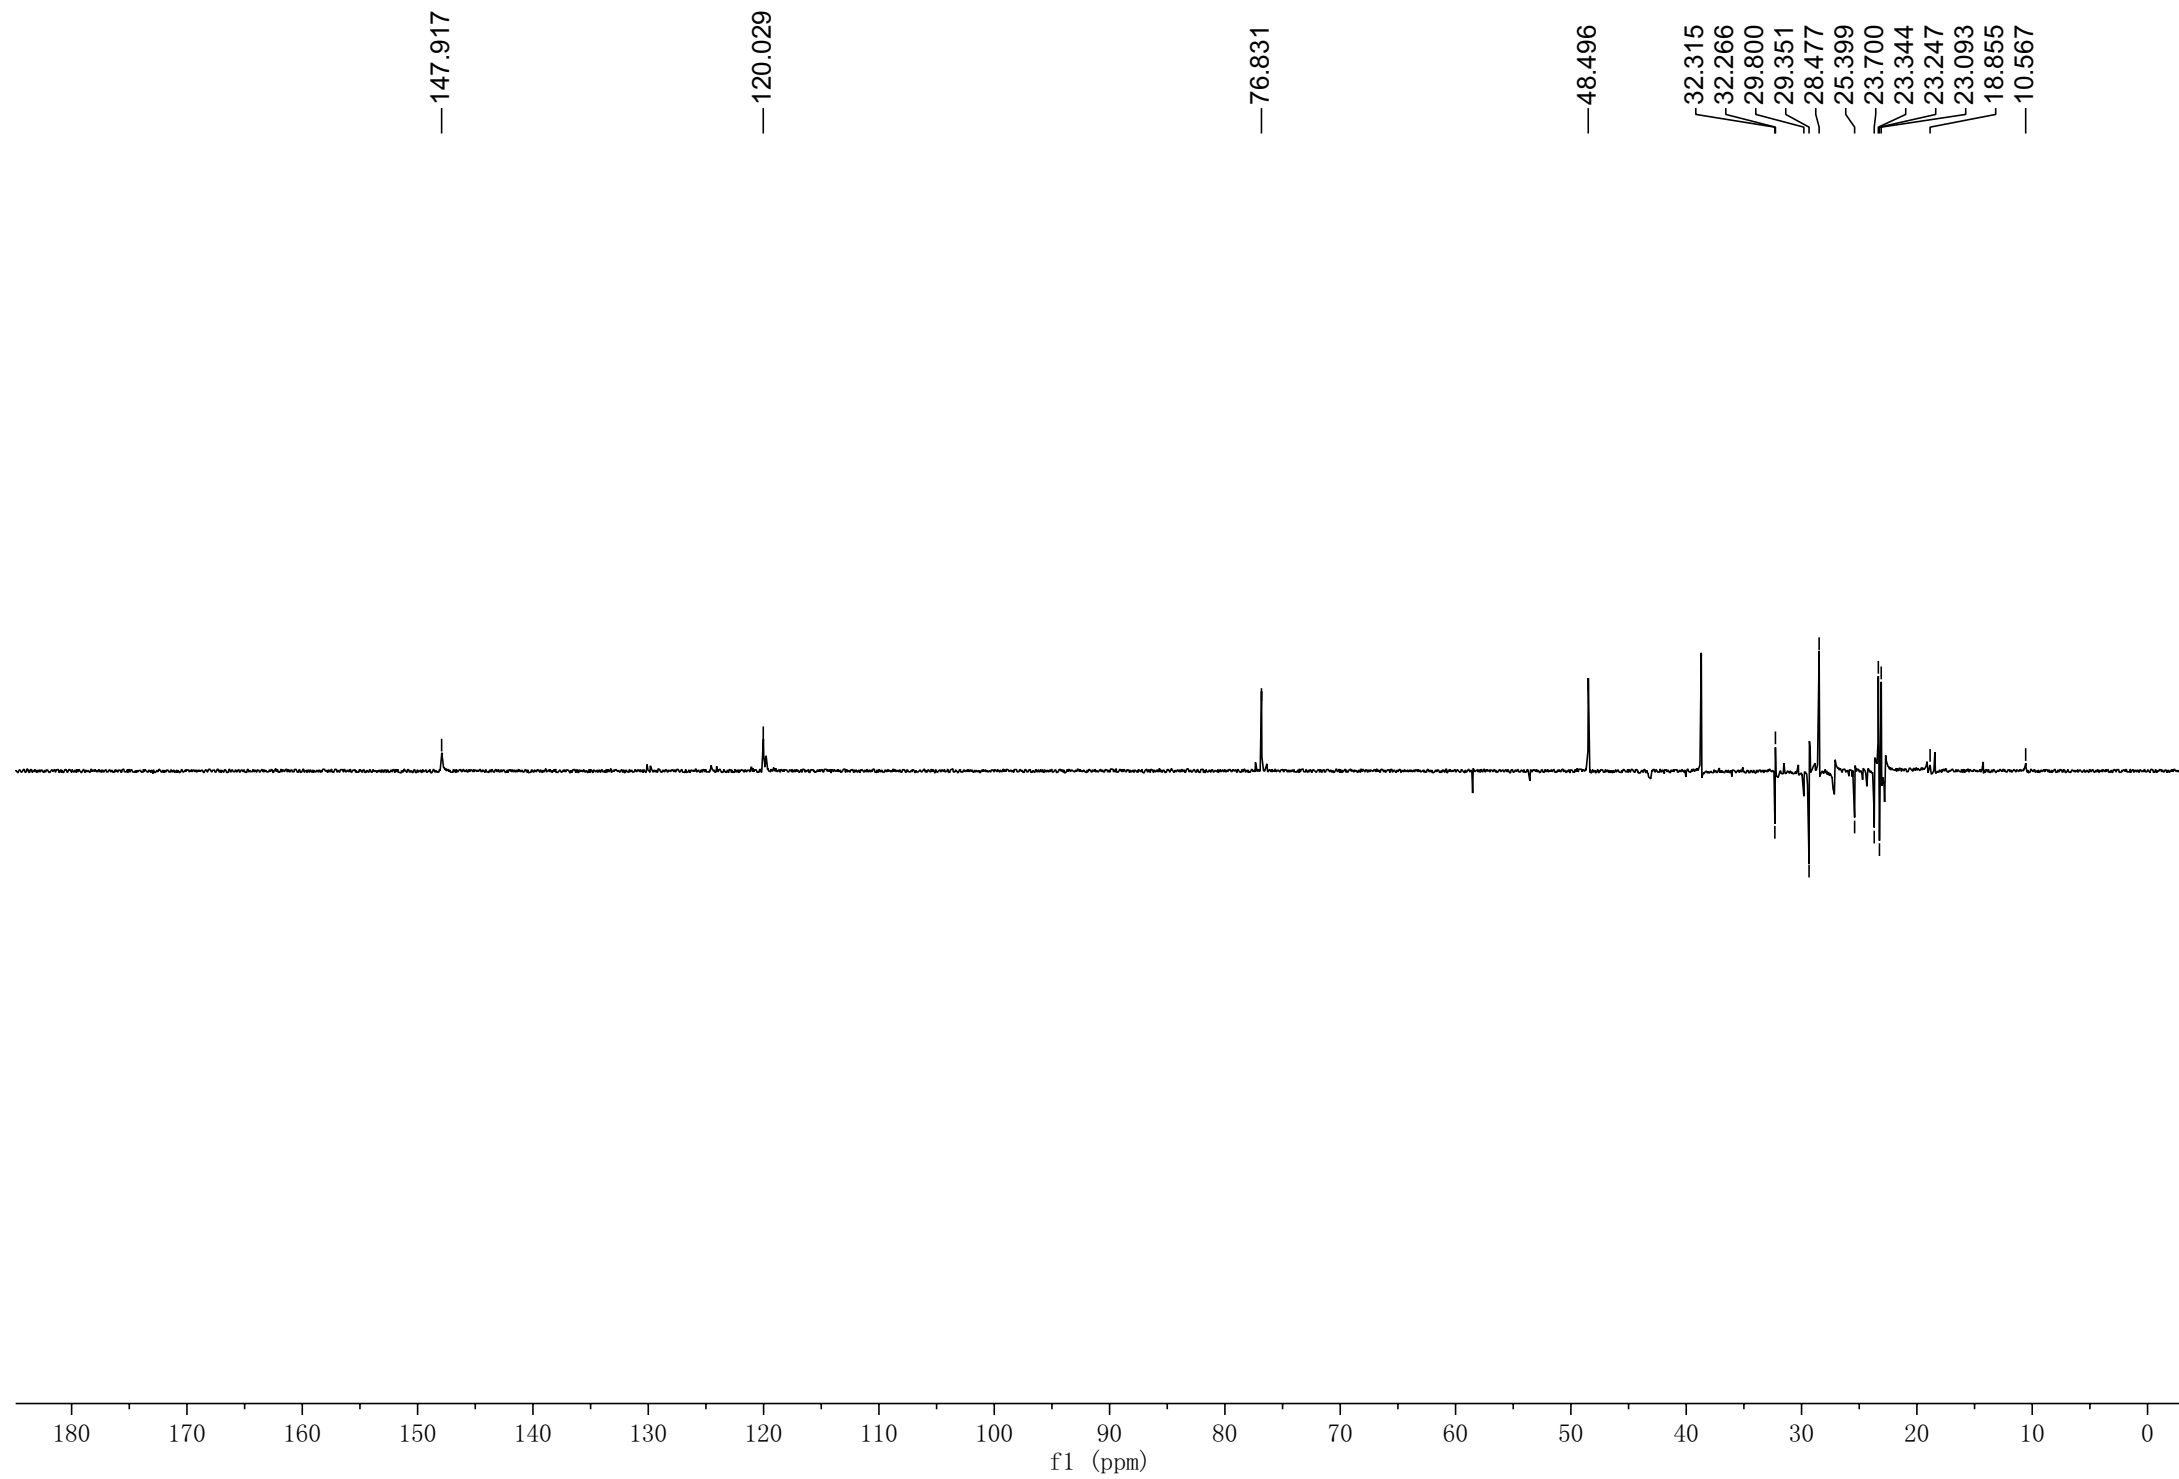



Figure S4. HSQC spectrum of compound 1 in CDCl<sub>3</sub>.

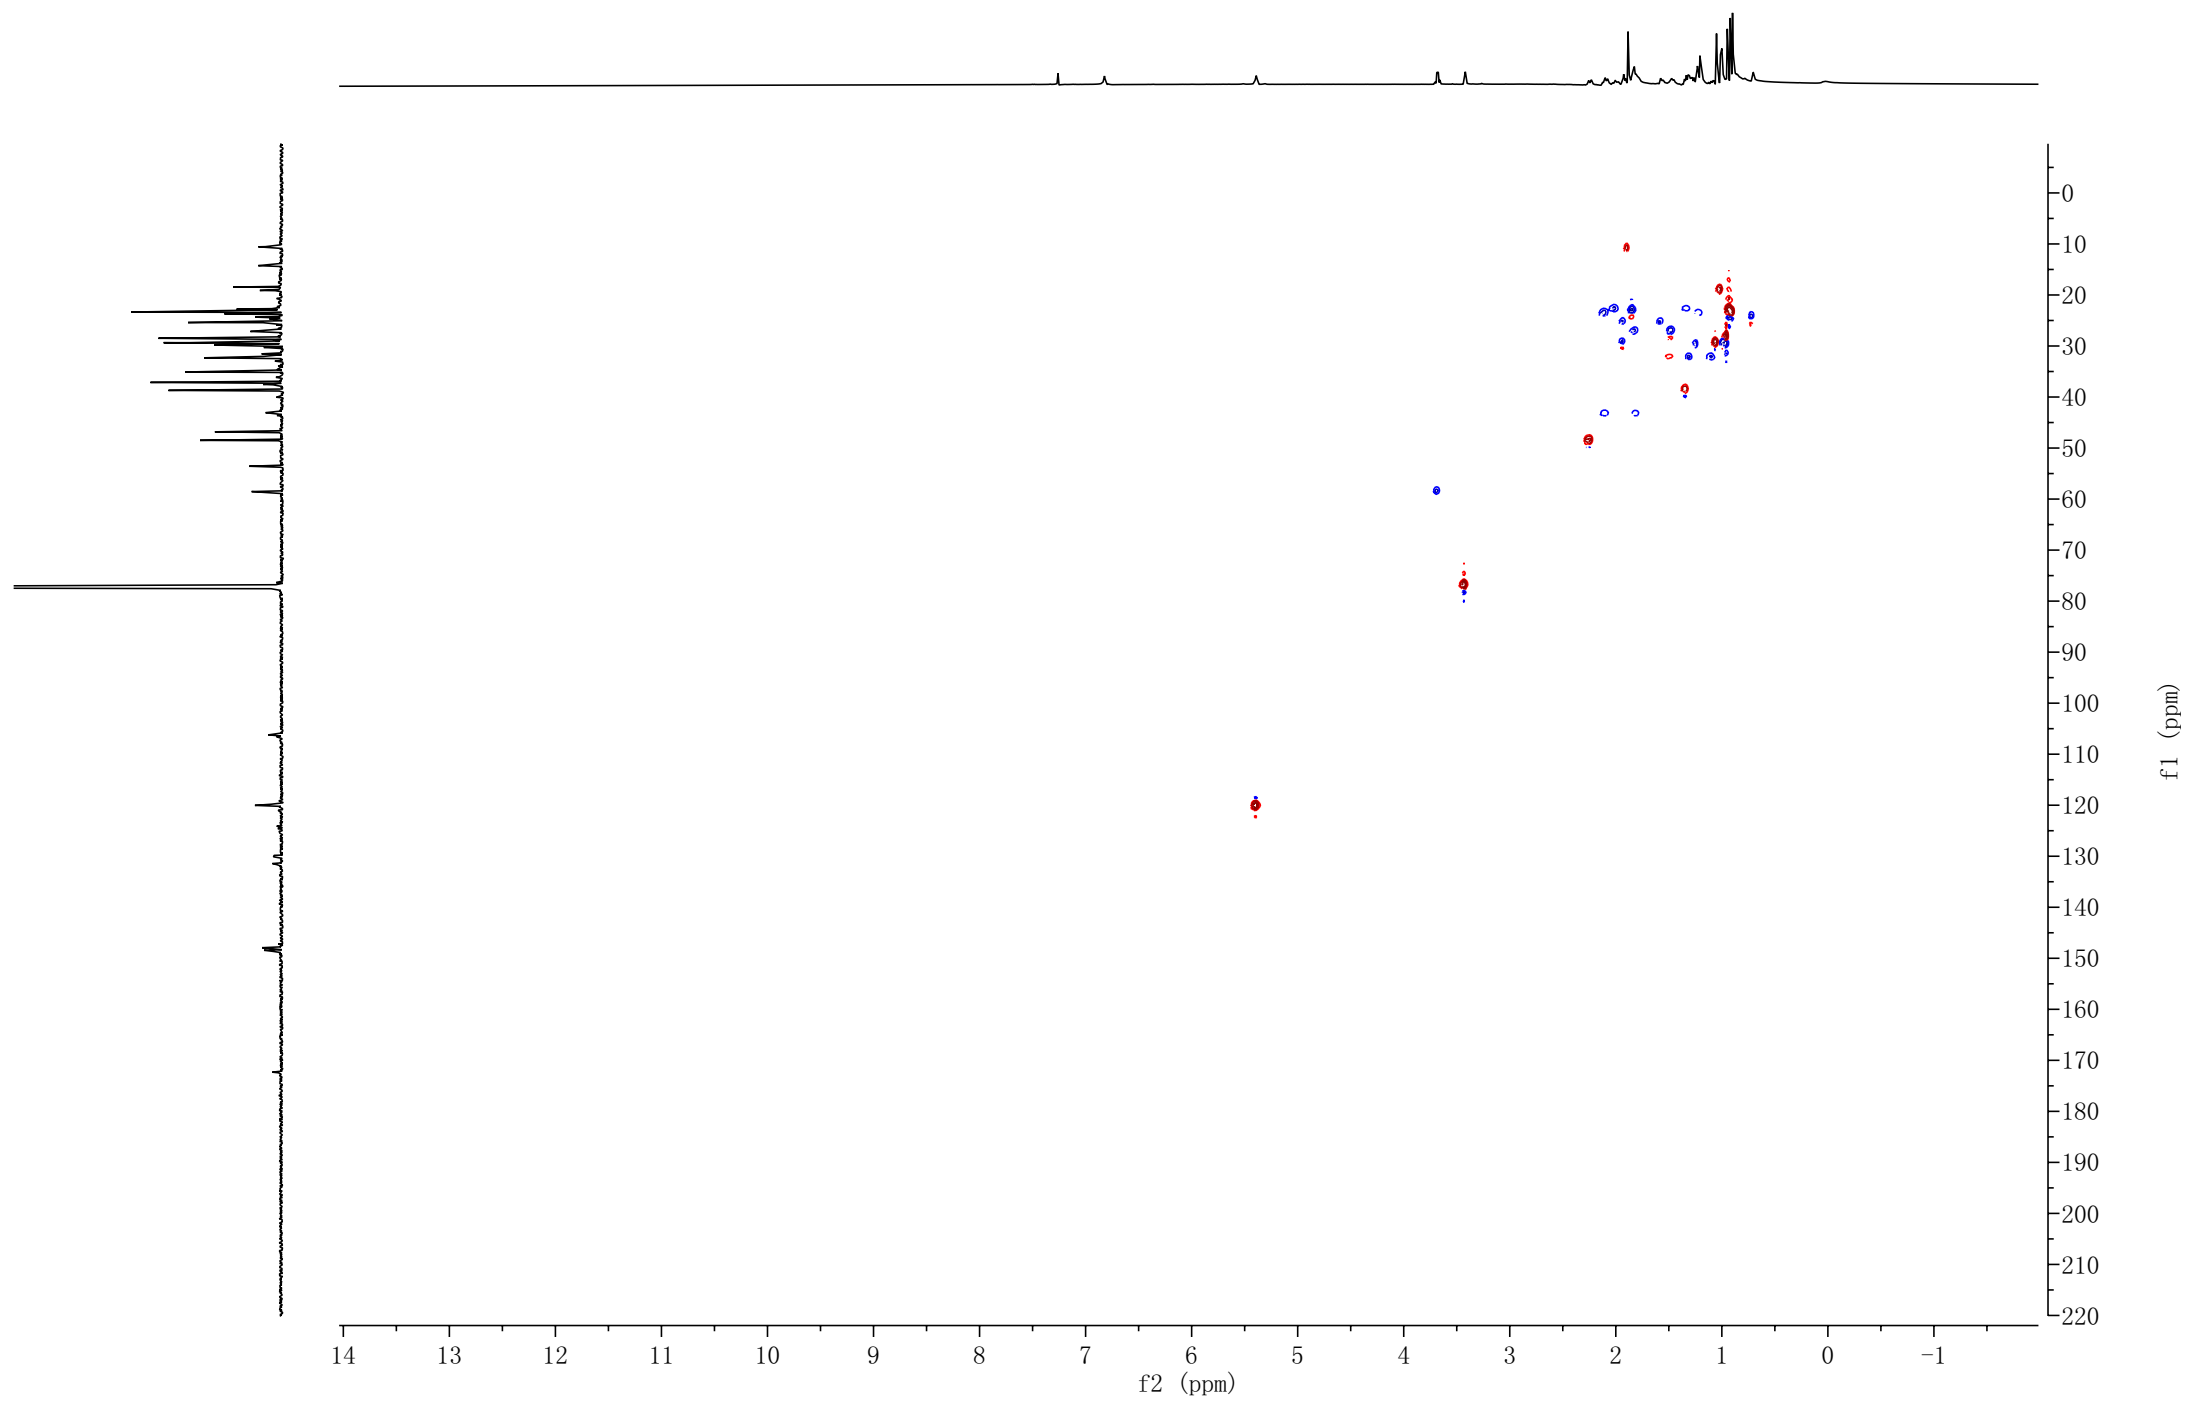

Figure S5. HSQC expansion spectrum of compound 1 in CDCl<sub>3</sub>.

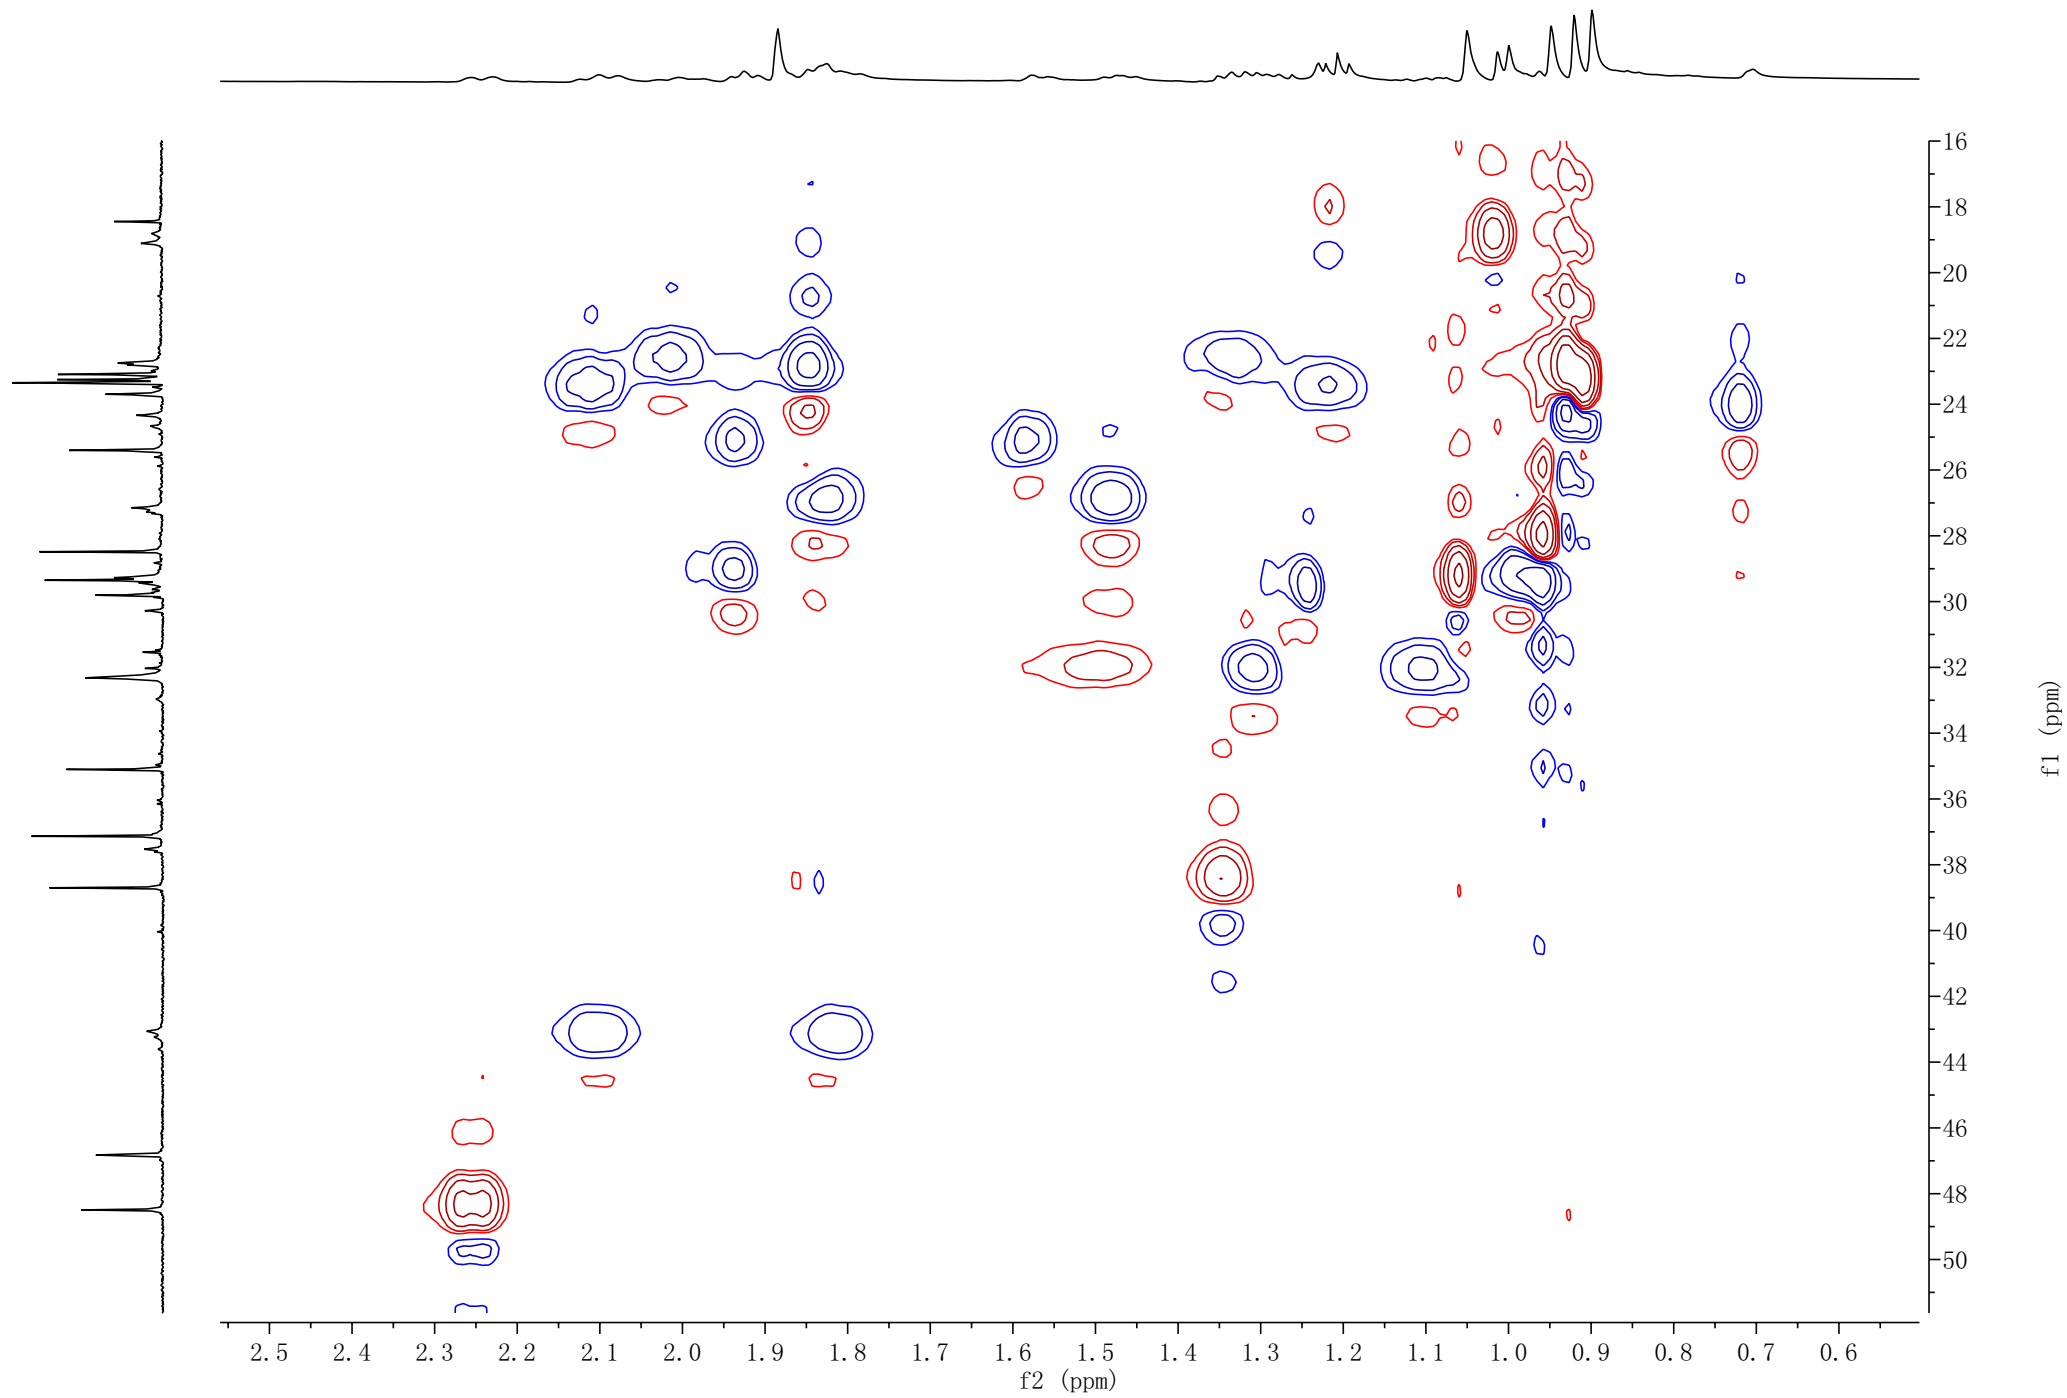

Figure S6. HMBC spectrum of compound 1 in CDCl<sub>3</sub>.

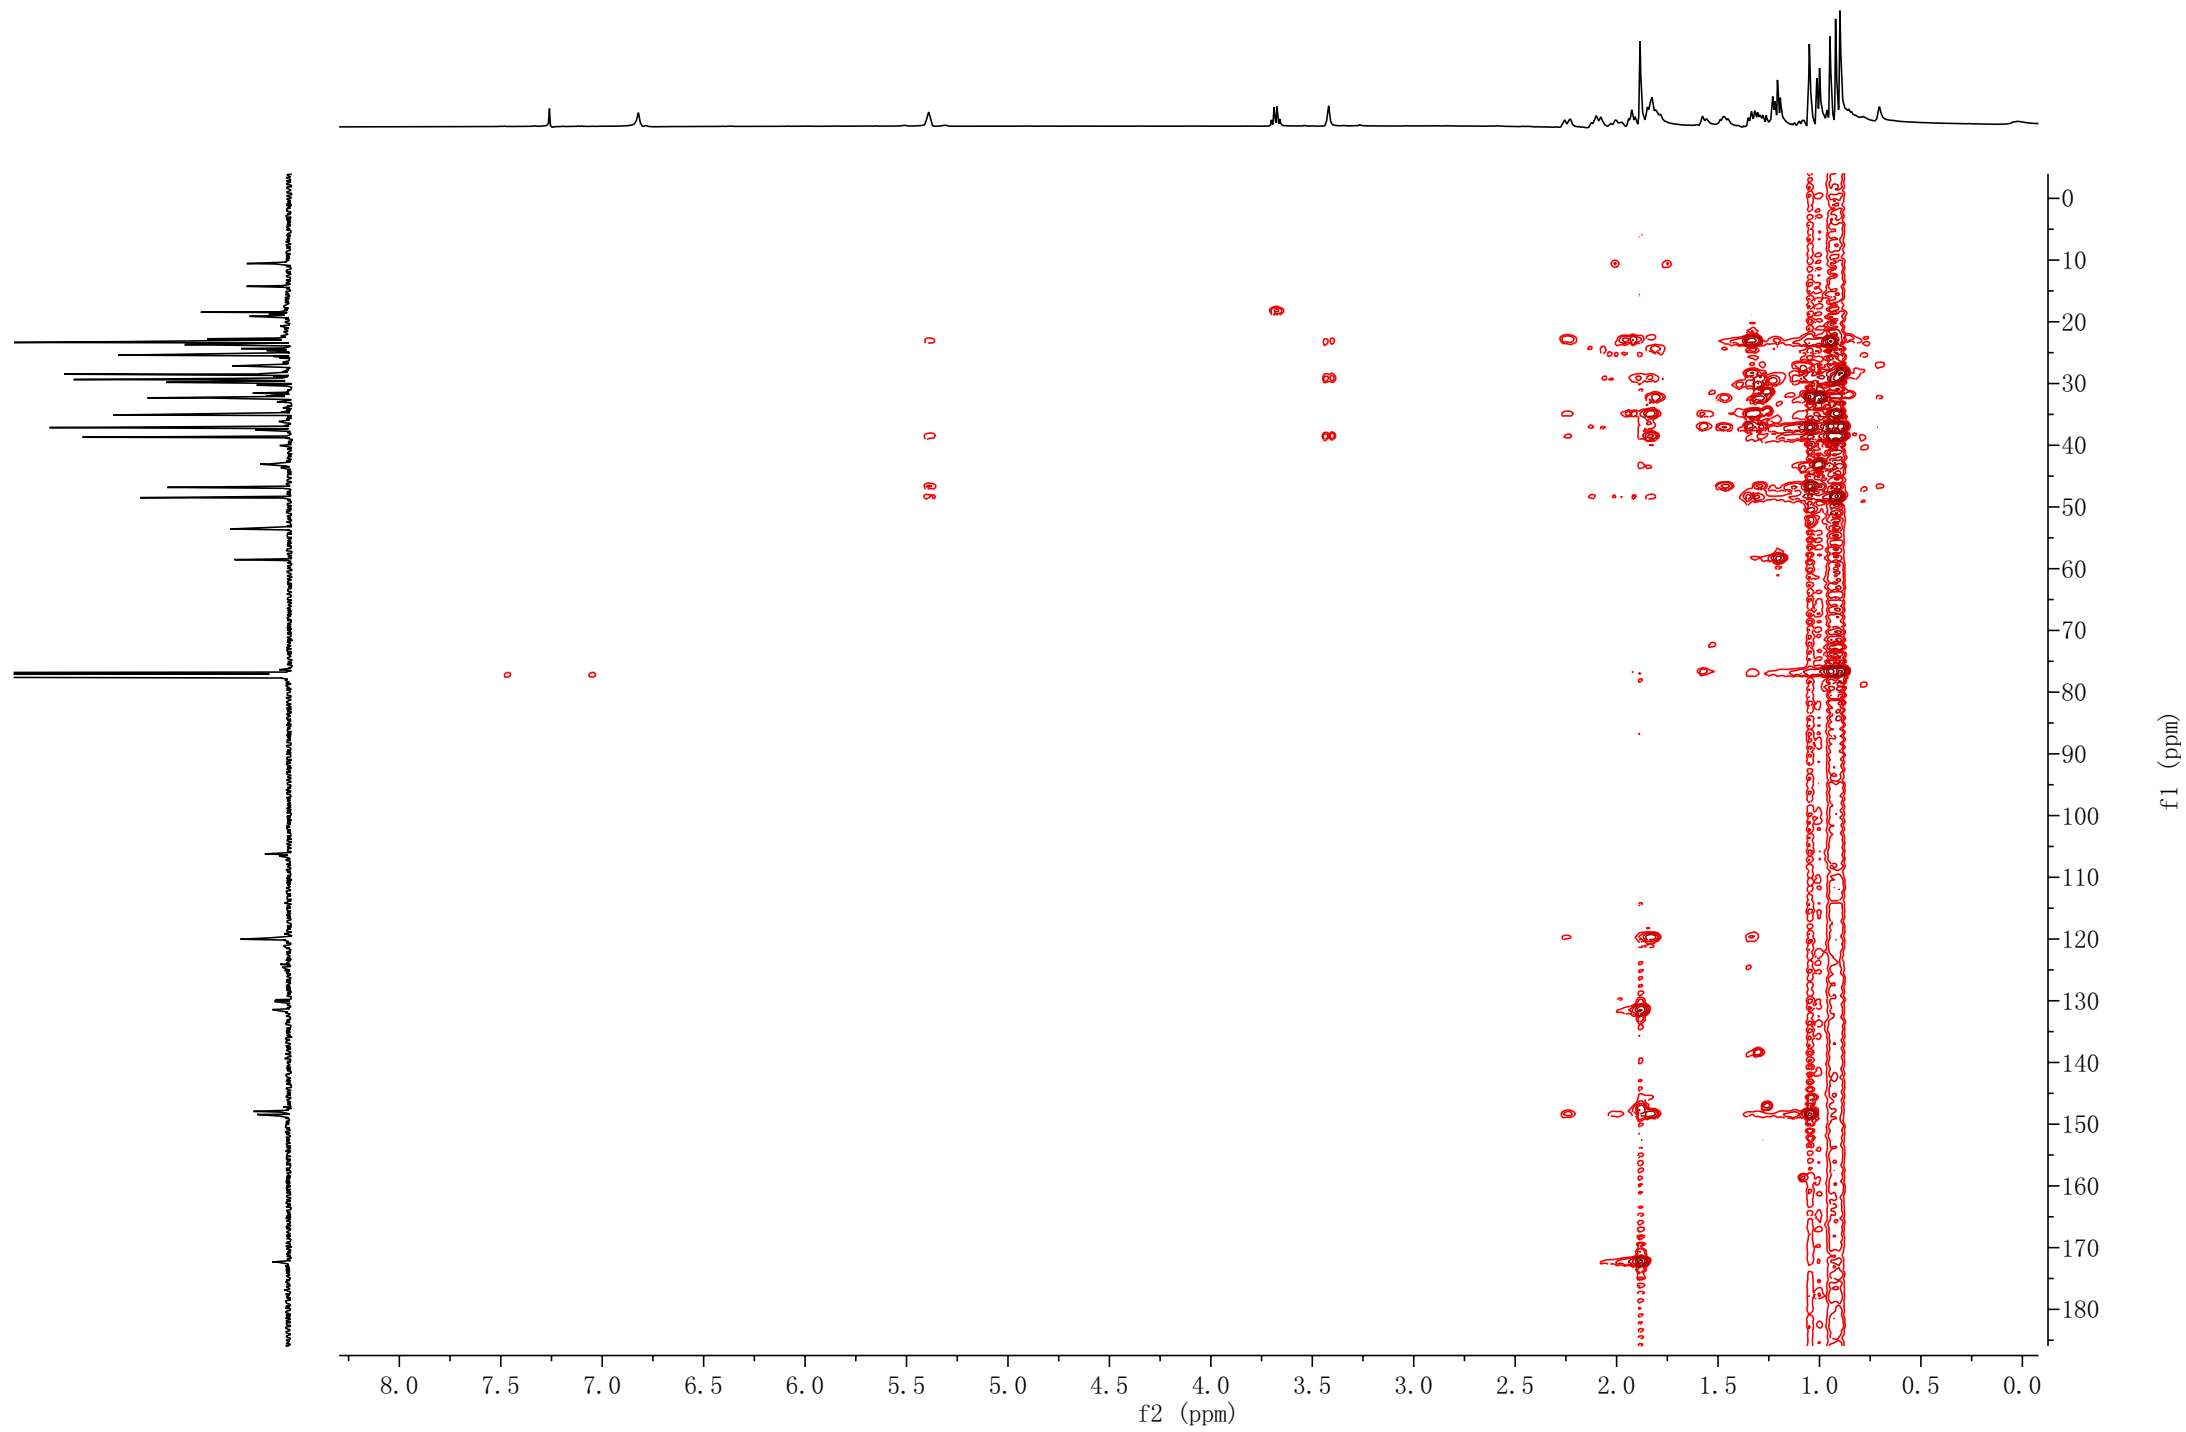

Figure S7. HMBC expansion spectrum of compound 1 in CDCl<sub>3</sub>.

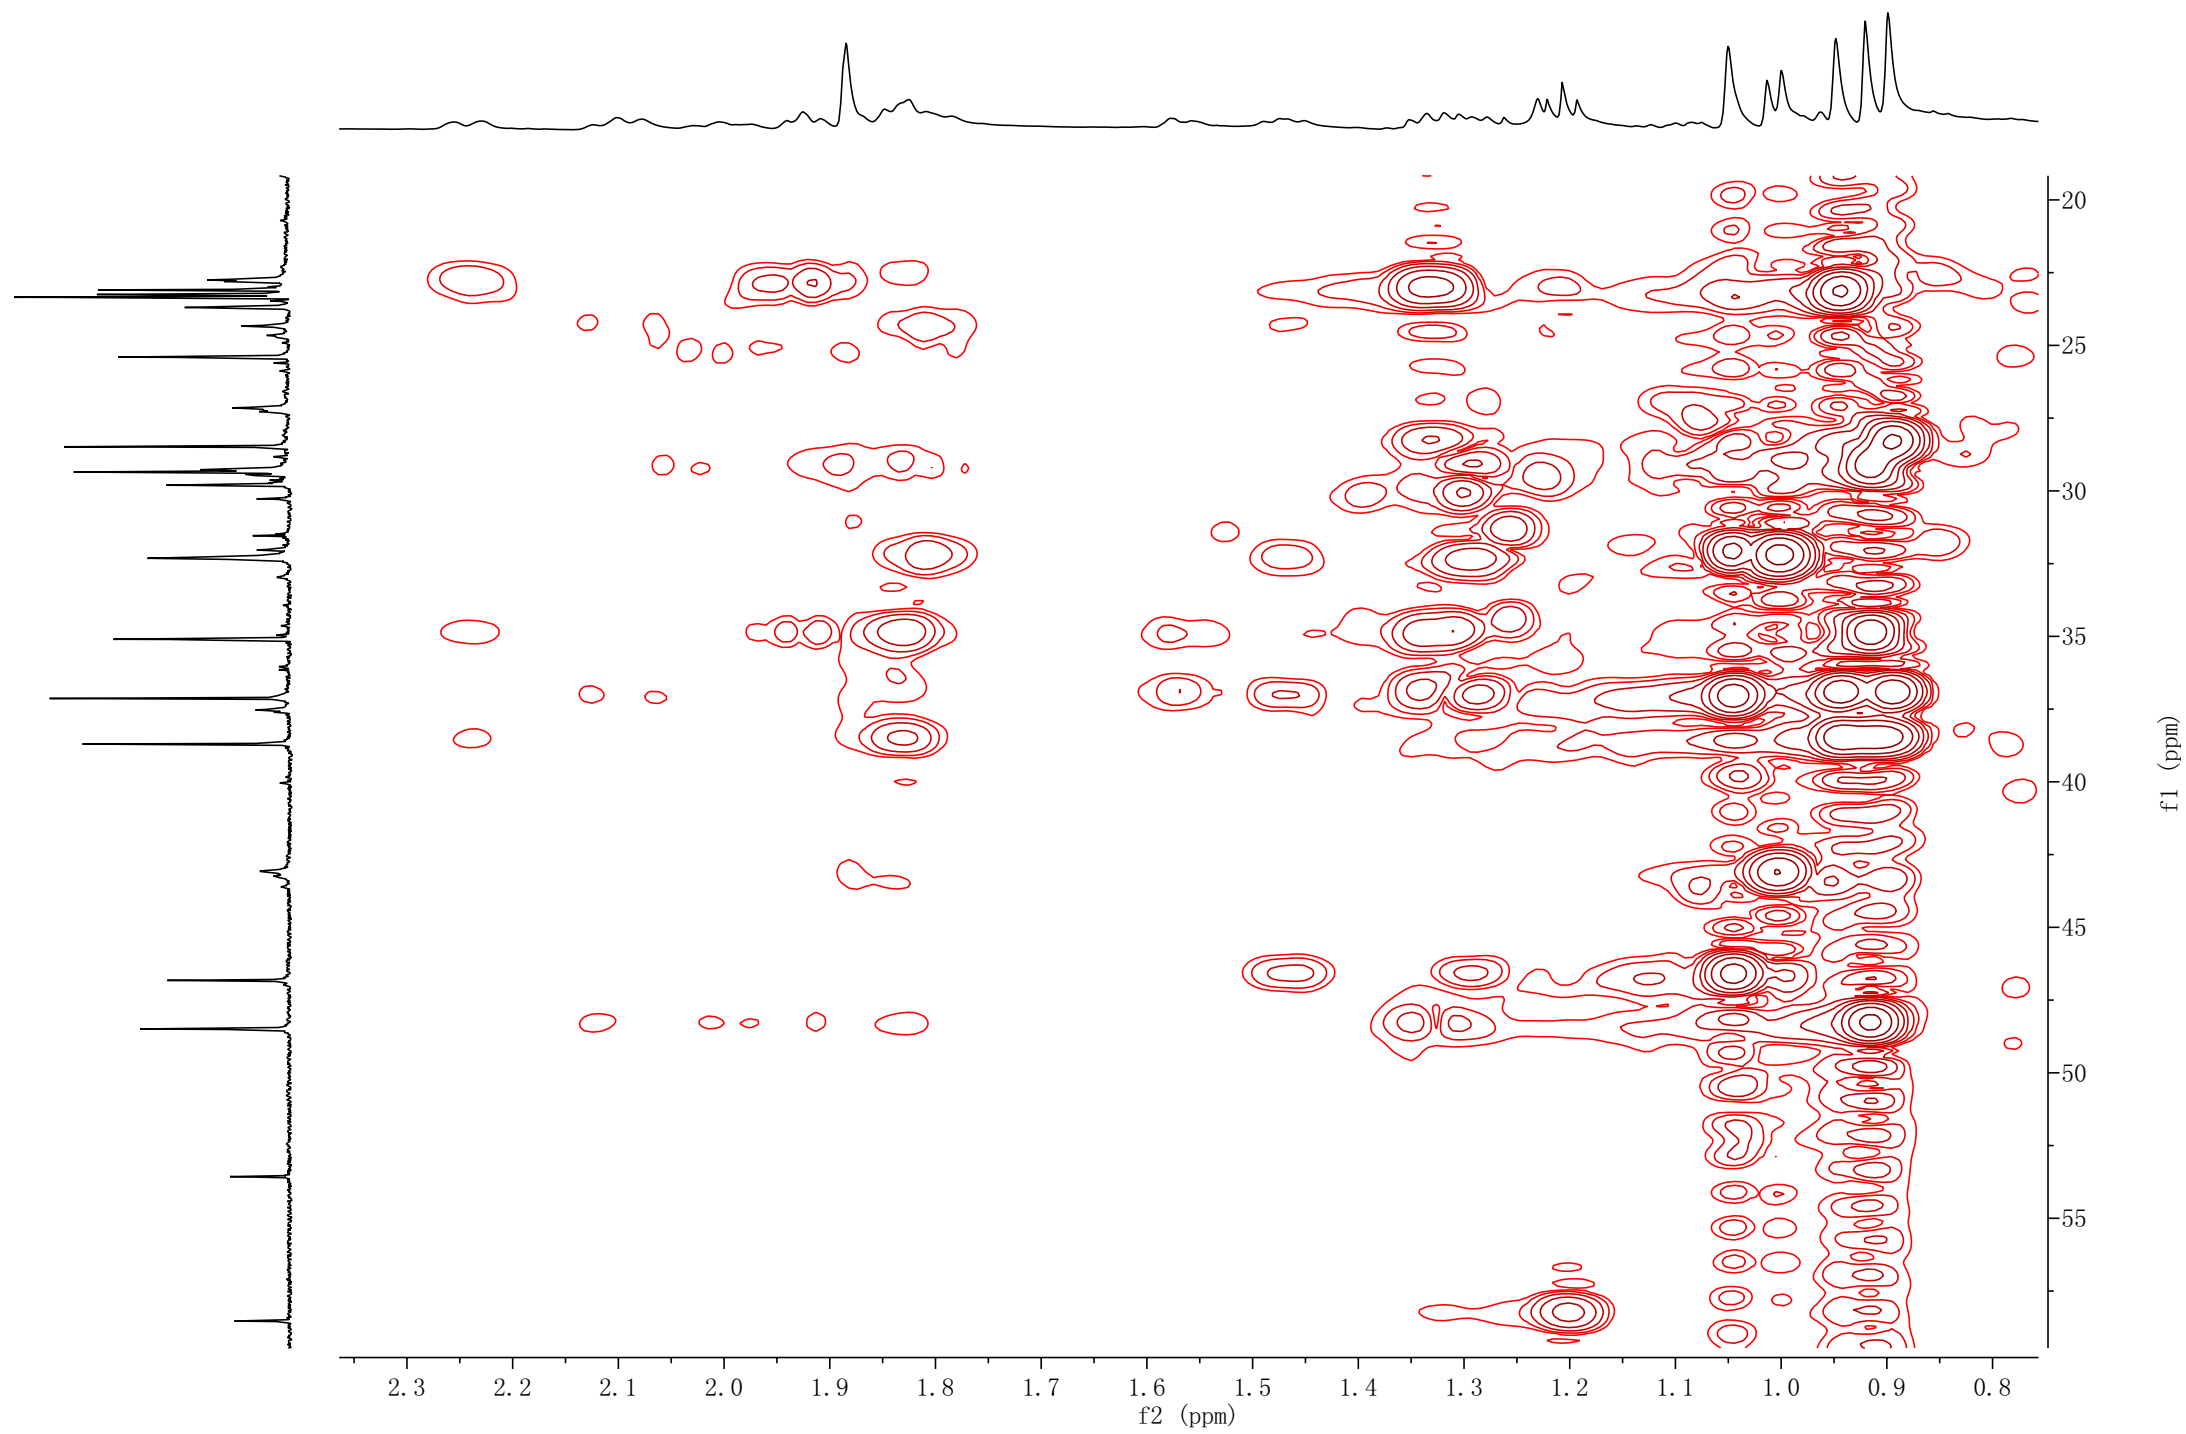

Figure S8.  $^1\text{H}$ - $^1\text{H}$  COSY spectrum of compound 1 in  $\text{CDCl}_3$ .

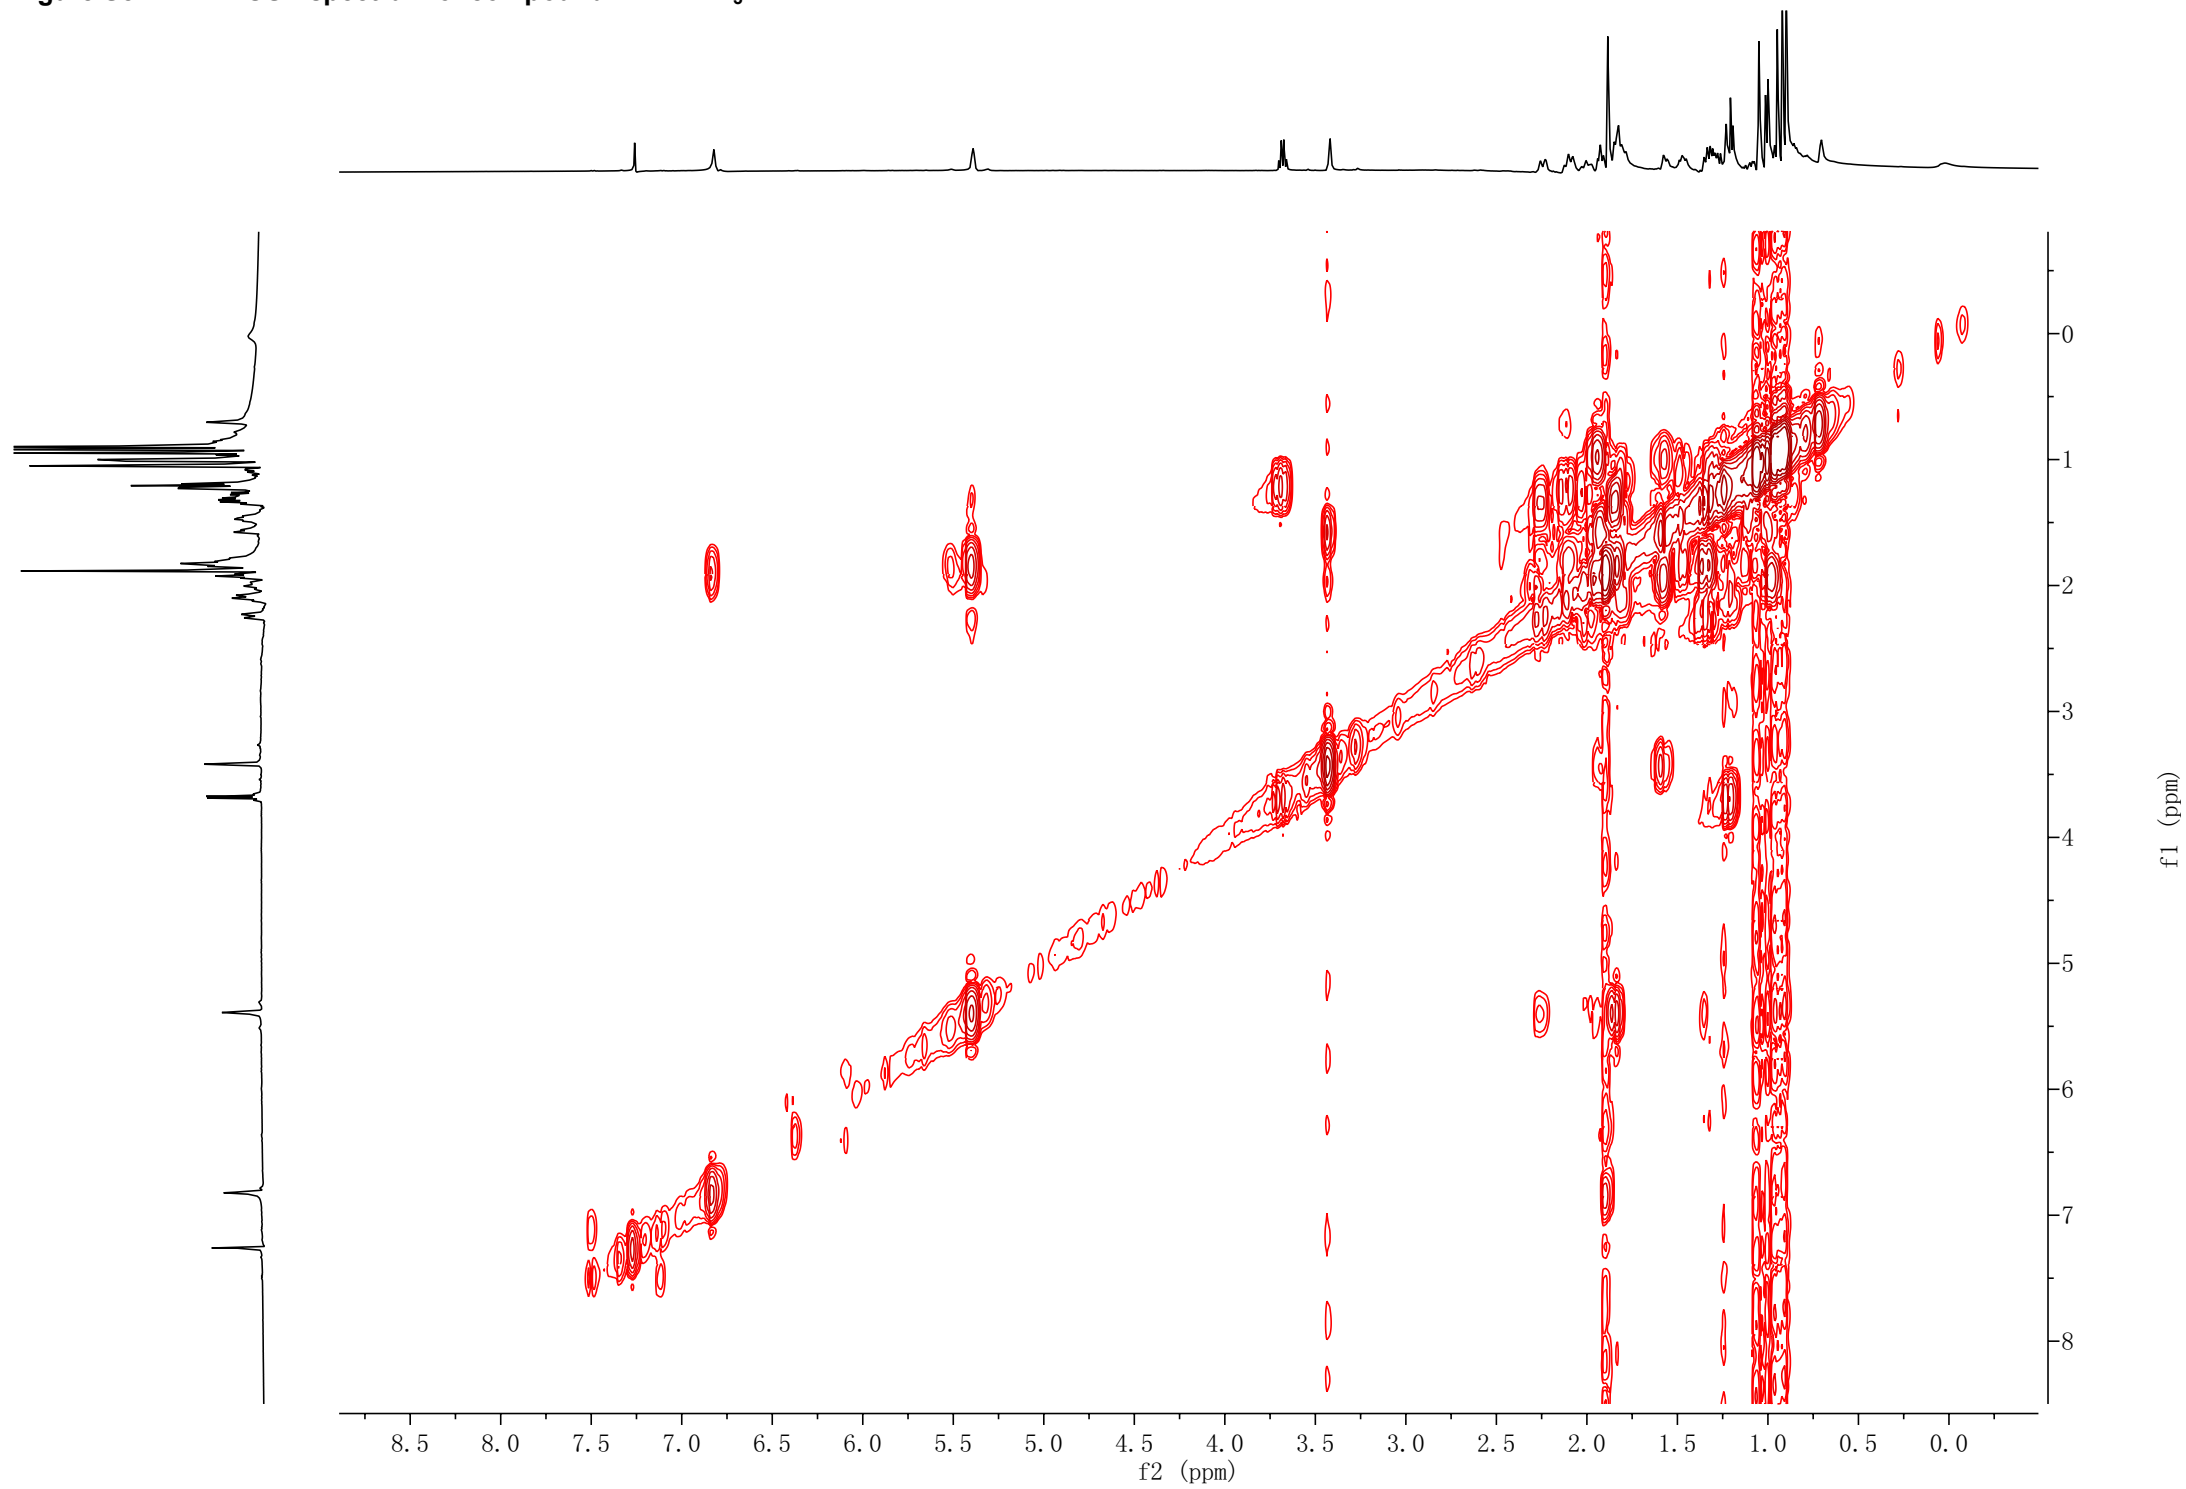

Figure S9.  $^1\text{H}$ - $^1\text{H}$  COSY expansion spectrum of compound 1 in  $\text{CDCl}_3$ .

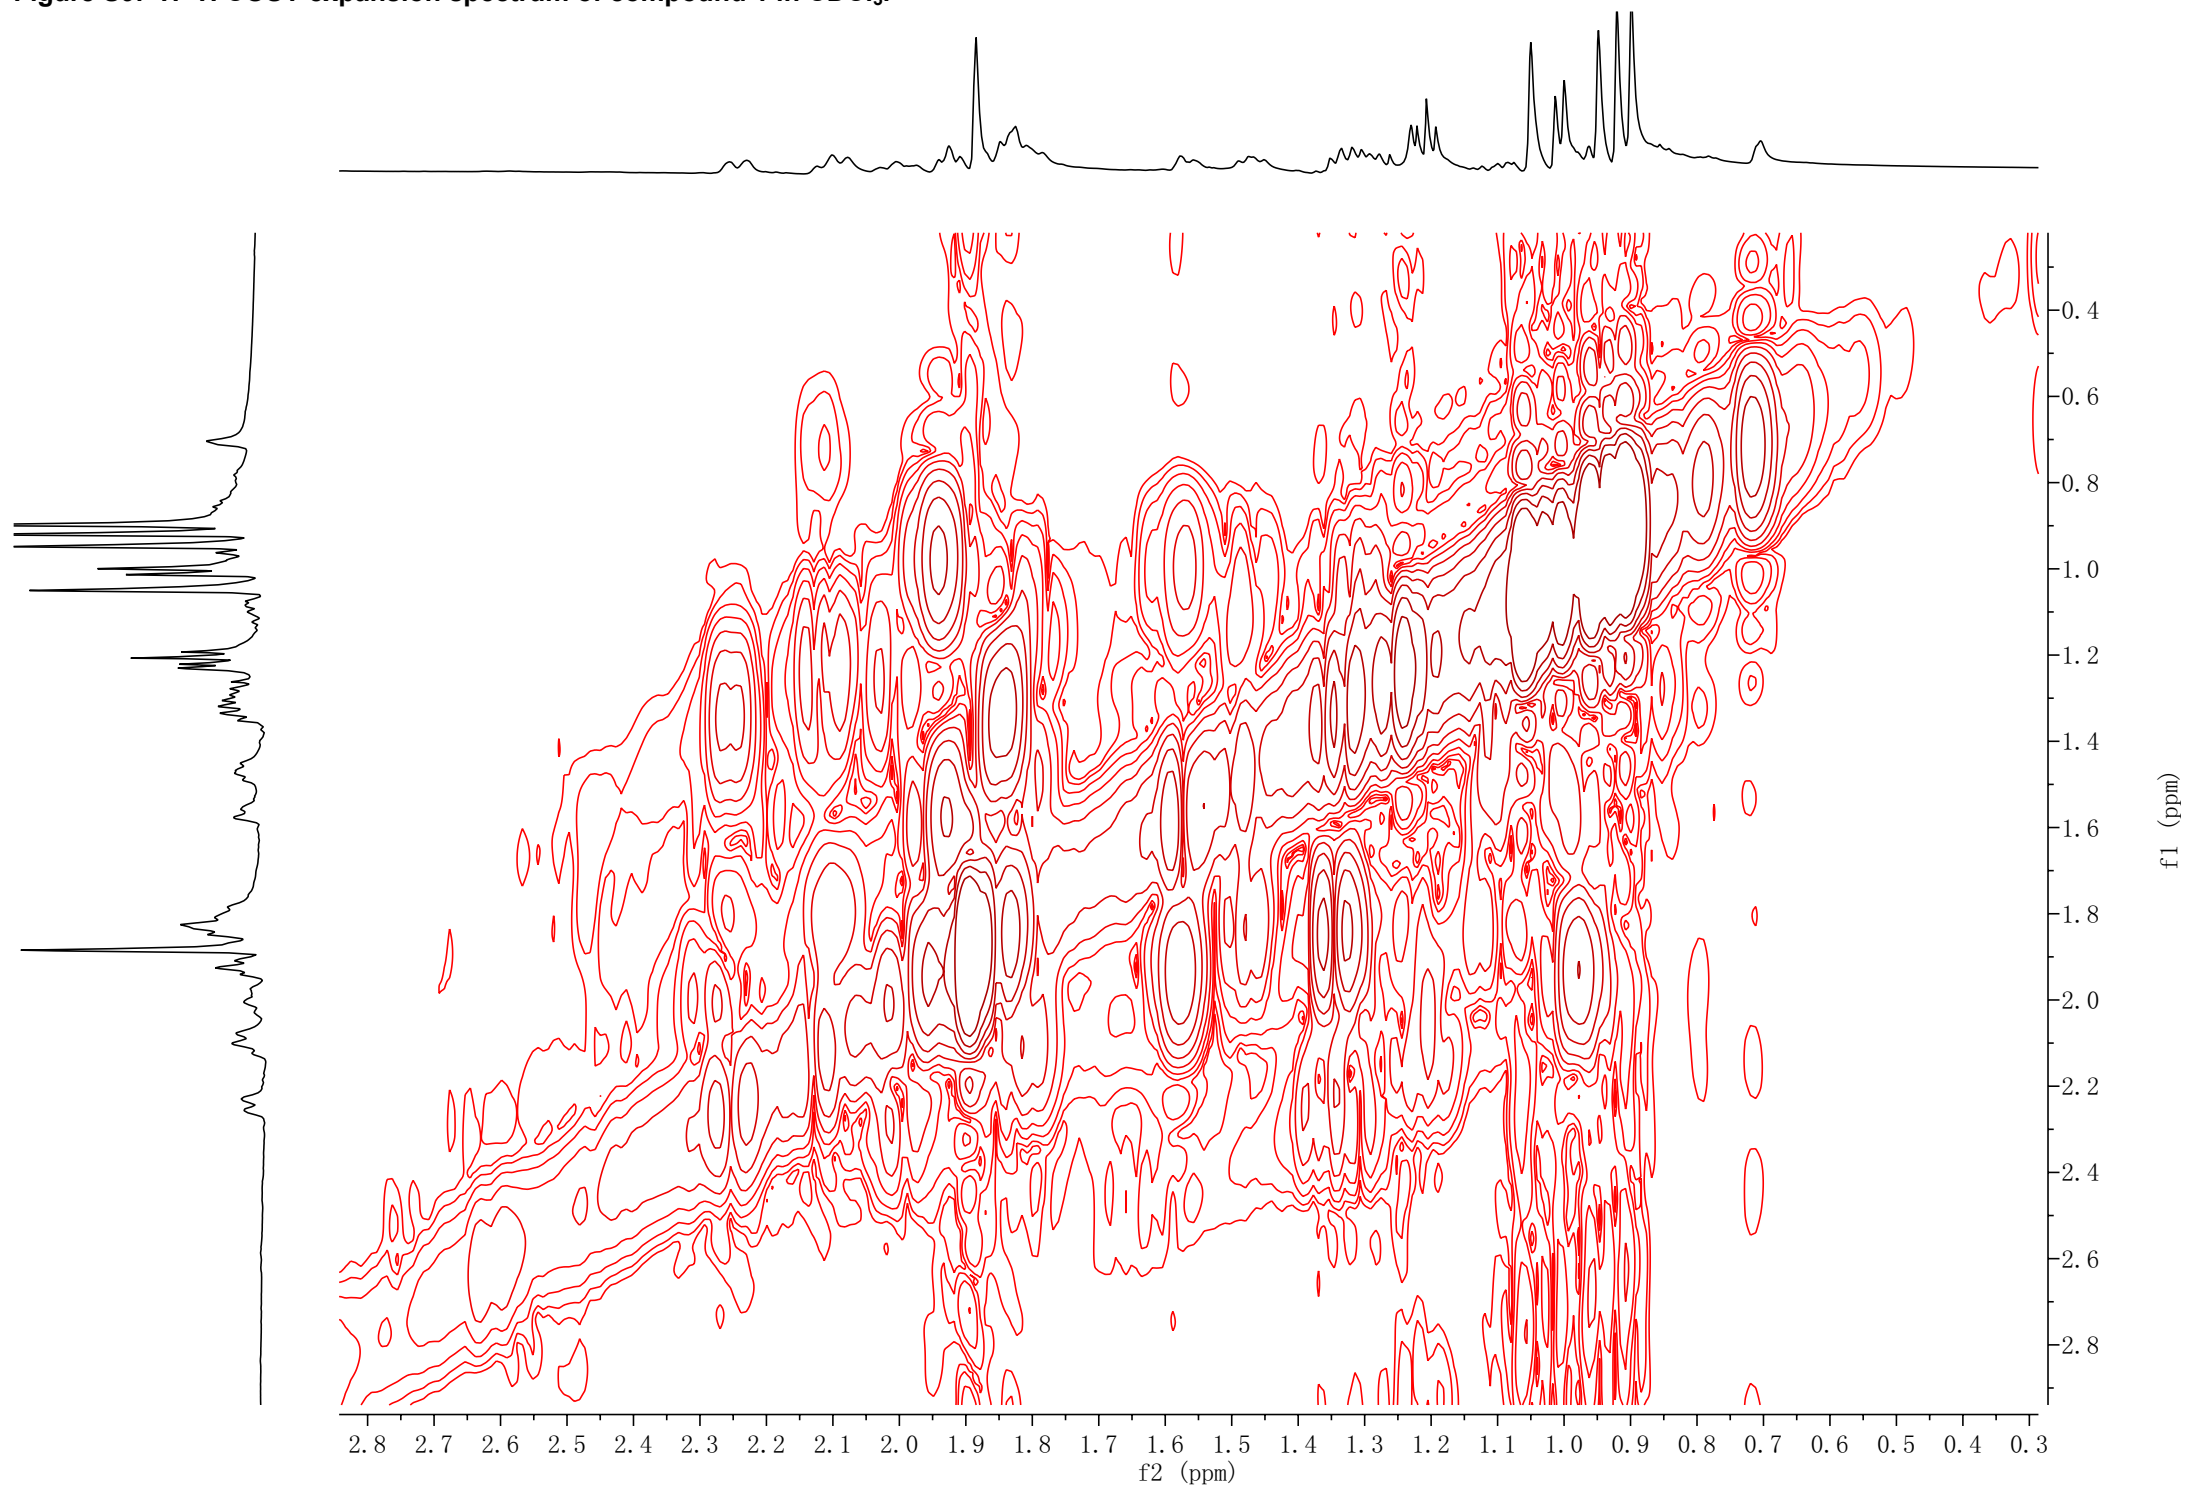

Figure S10. NOESY spectrum of compound 1 in CDCl<sub>3</sub>

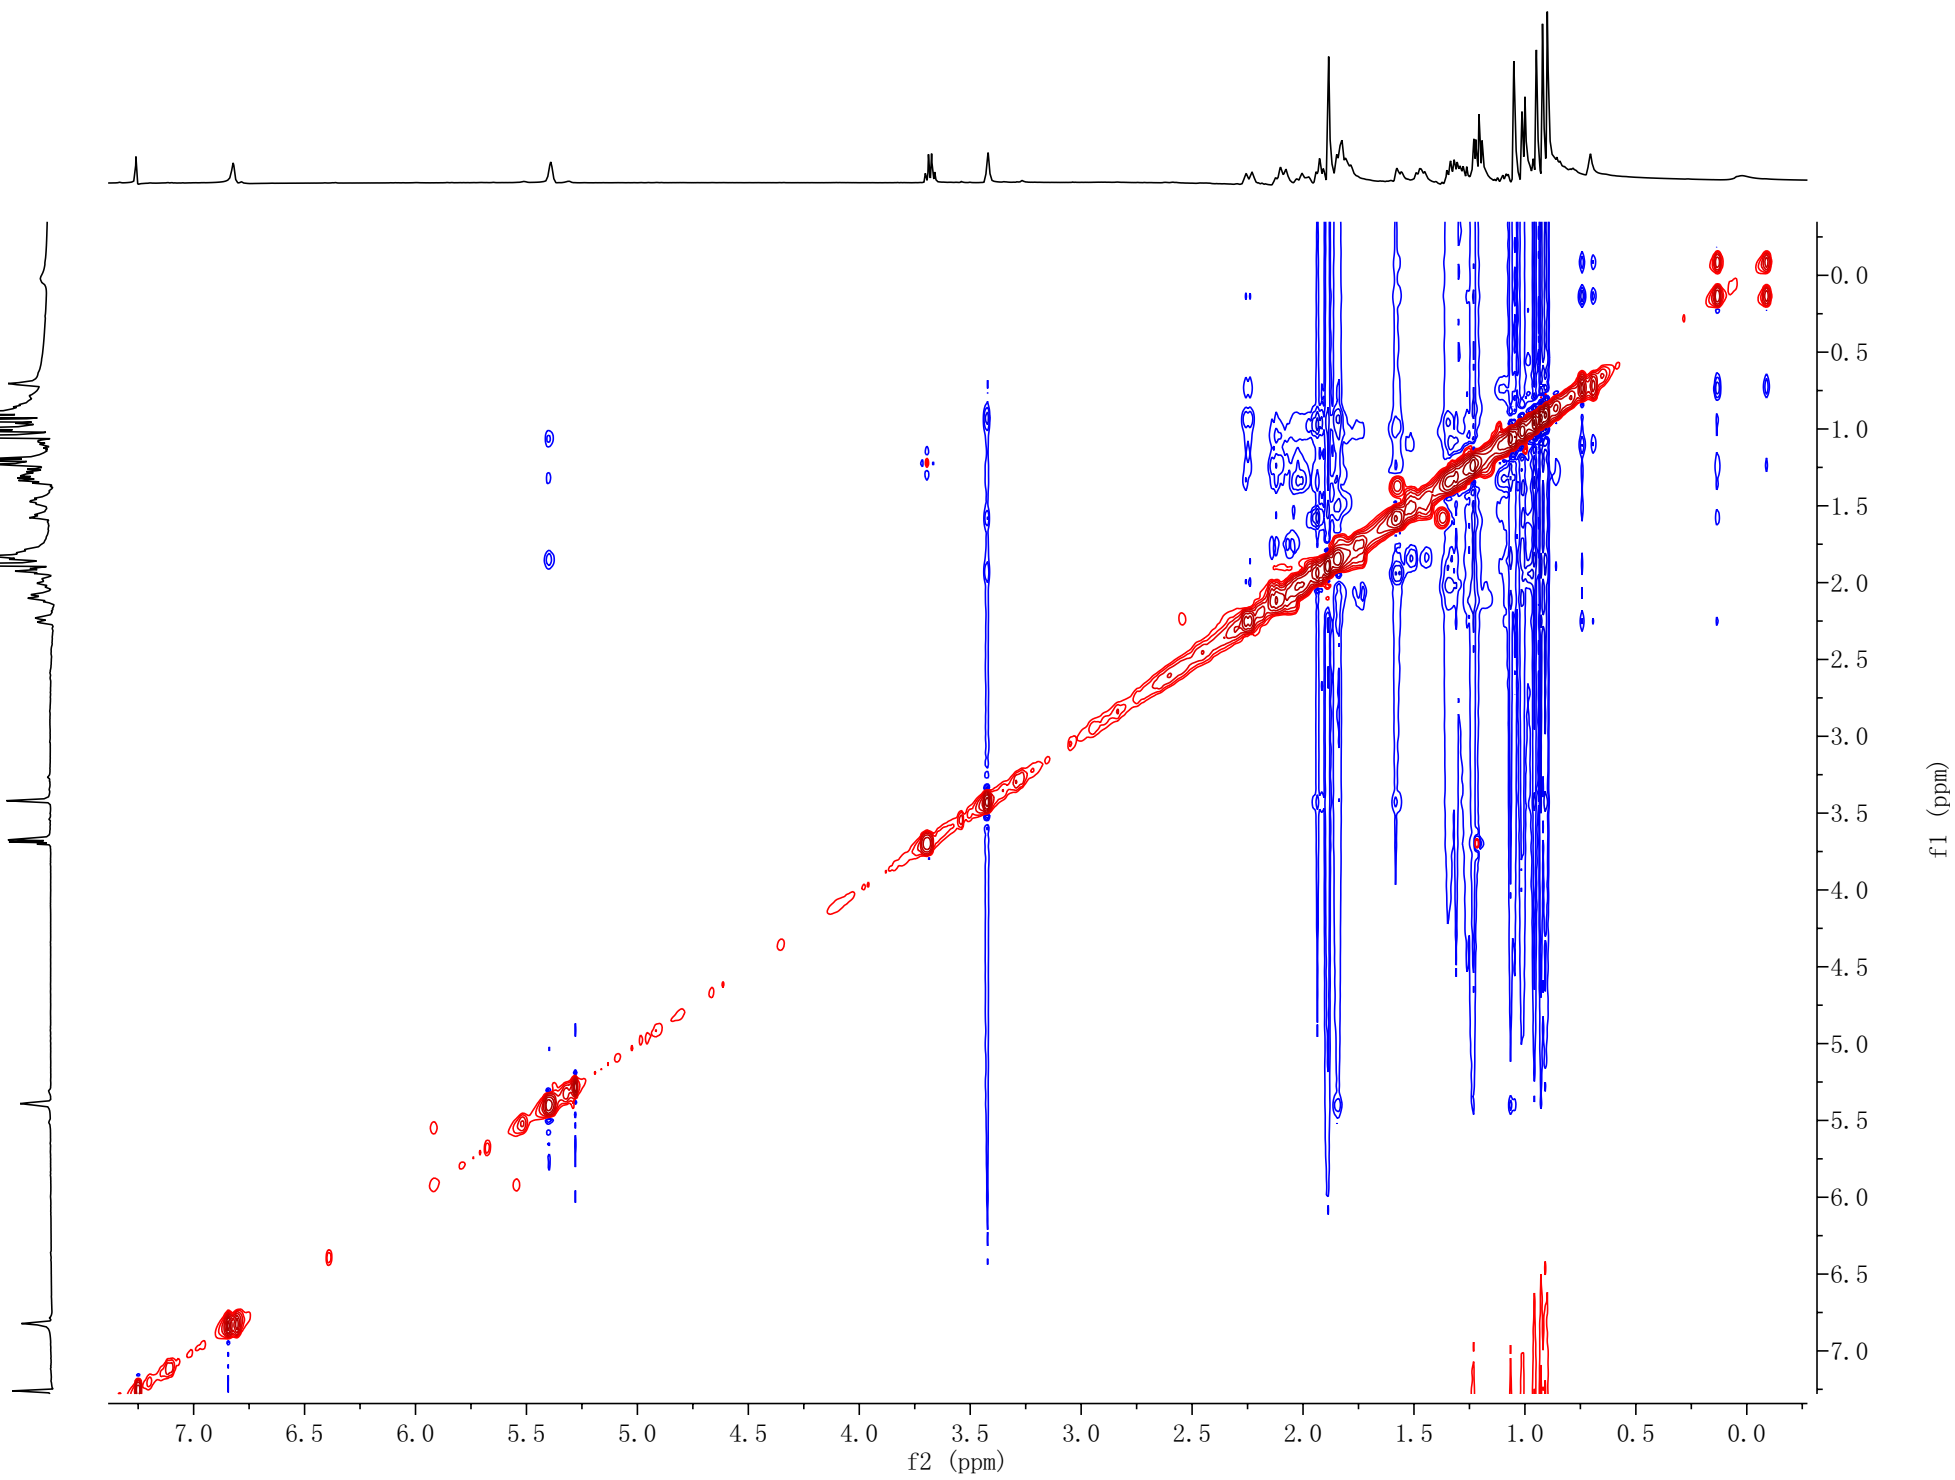

Figure S11. NOESY expansion spectrum of compound 1 in CDCl<sub>3</sub>

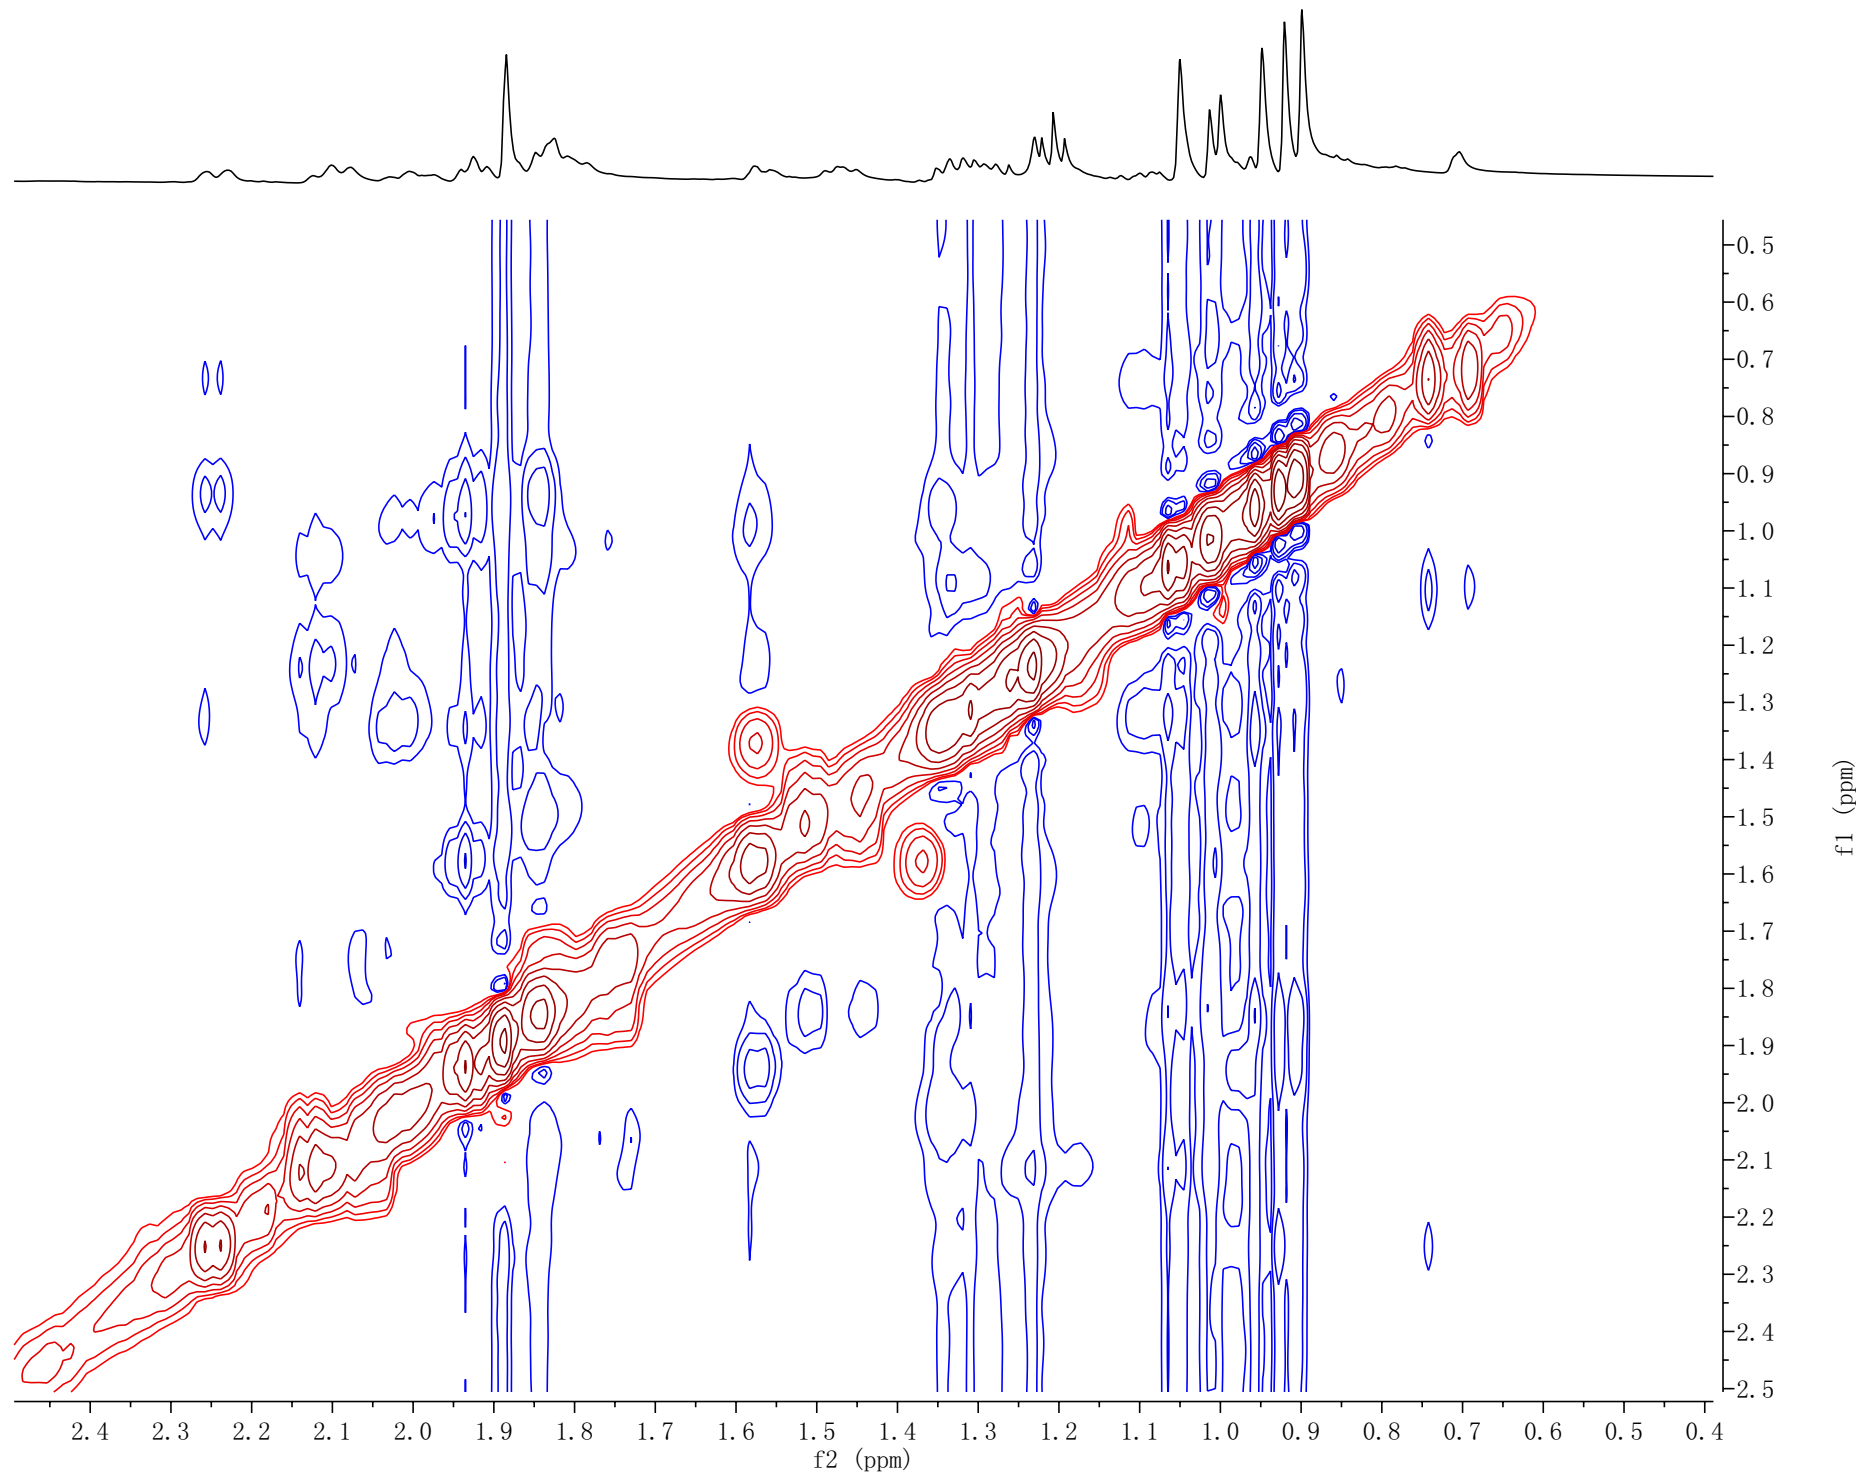

Supplement: c8ob03117g1.pdf [file c8ob03117g1.pdf]
